# Supplementary material for: Multi-stimuli-responsive behaviours of fluorenone-based donor–acceptor–donor triads in solution and supramolecular gel states
Source: Royal Society of Chemistry journal article supplement (doi:10.1039/d4ma00477a), 2024-01-01
Supplement: d4ma00477a1.pdf [file d4ma00477a1.pdf]

Electronic Supplementary Information (ESI)

# **Multi-Stimuli-Responsive Behaviours of Fluorenone-Based Donor– Acceptor–Donor Triads in Solution and Supramolecular Gel States**

Mao Suzuki,<sup>a</sup> Atsushi Seki,<sup>\*,a,b</sup> Syota Yamada,<sup>a</sup> and Ken'ichi Aoki<sup>a,b</sup>

- a. Department of Chemistry, Graduate School of Science, Tokyo University of Science, 1-3 Kagurazaka, Shinjuku-ku, Tokyo, 162-8601, Japan.
- b. Department of Chemistry, Faculty of Science, Tokyo University of Science, 1-3 Kagurazaka, Shinjuku-ku, Tokyo, 162-8601, Japan. E-mail: a\_seki\_3@rs.tus.ac.jp

## **Table of contents**

**S-1. Synthesis**

**S-2. Gelation Properties**

**S-3. Liquid-Crystalline Properties**

**S-4. Intermolecular Hydrogen Bonding**

**S-5. Density functional theory (DFT) calculations**

**S-6. Absorption and Photoluminescent Properties**

**S-7. Acid-Responsive Behaviours**

**S-8. <sup>1</sup>H and <sup>13</sup>C NMR spectra**

## S-1. Synthesis

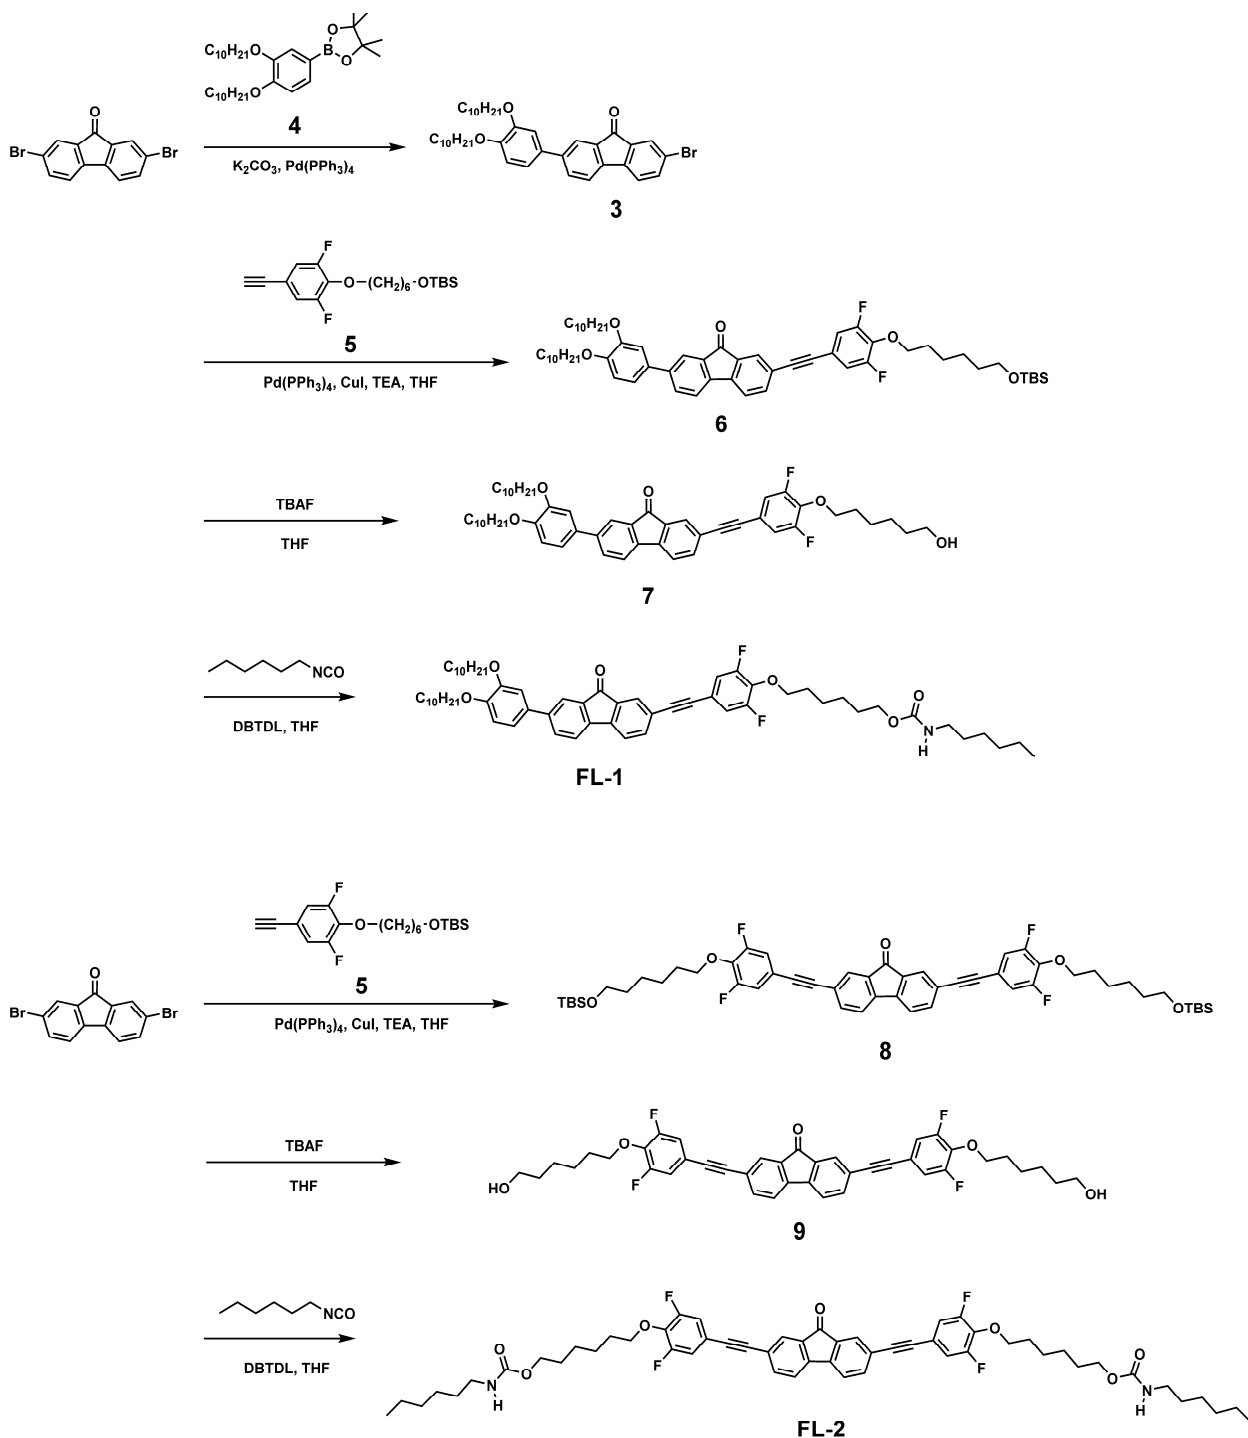

**Scheme S1** Synthetic route of fluorenone-based D-A-D triads **FL-1** and **FL-2**.

All reactions were performed under argon atmosphere in a well-dried three-necked flask equipped with a magnetic stirring bar. Fluorenone-based D-A-D triads **FL-1** and **FL-2** were synthesized as shown in Scheme S1. The mono-substituted intermediate compound **3** was synthesized via the Suzuki-Miyaura reaction between 2,7-dibromo-9-fluorenone and 3,4-bis(decyloxy)phenylboronic acid pinacol ester **4**. The Sonogashira-Hagihara cross

coupling reaction of compound **3** with using phenylacetylene derivative **5** was afforded to the compound **6**.<sup>S1,S2</sup> The following deprotection of TBS unit by tetrabutylammonium fluoride (TBAF) gave hydroxy-terminated precursor **7**. The bilaterally symmetrical intermediate **8** was synthesized via the Sonogashira-Hagihara cross-coupling reaction between 2,7-dibromo-9-fluorenone and phenylacetylene derivative **5**. The D-A-D triads **9** bearing two hydroxy-extremities was obtained by the deprotection reaction using TBAF. The target compounds **FL-1** and **FL-2** were synthesized via urethanation between hexylisocyanate and corresponding hydroxy compounds **7** and **9**, respectively.

#### 2-Bromo-7-[3',4'-bis(decyloxy)phenyl]-9-fluorenone (**3**)

To a stirred solution of 3,4-bis(decyloxy)phenylboronic acid pinacol ester **4** (4.75 g, 9.19 mmol, 1.00 eq.), 2,7-dibromo-9-fluorenone (4.66 g, 13.8 mmol, 1.50 eq.), and Pd(PPh<sub>3</sub>)<sub>4</sub> (426 mg, 0.36 mmol, 0.04 eq.) in dry THF (200 mL) was added K<sub>2</sub>CO<sub>3</sub> aqueous solution (4 M, 70 mL, 276 mmol) under argon atmosphere. The reaction mixture was refluxed for 40 hours. After cooling to room temperature, the product was extracted with chloroform (100 mL ×1, 50 mL ×3). The collected organic fractions were combined and dried over Na<sub>2</sub>SO<sub>4</sub>. After filtration and evaporation, the crude product was purified by the silica gel column chromatography (eluent: *n*-hexane/THF = 10/1; v/v). and recrystallization from THF/ethyl acetate to give compound **3** as an orange solid (1.84 g, 2.84 mmol, 31% yield).

<sup>1</sup>H NMR (400 MHz, CDCl<sub>3</sub>): δ [ppm] = 7.86 (d, 1H, *J* = 1.6 Hz), 7.78 (d, 1H, *J* = 1.8 Hz), 7.69 (dd, 1H, *J* = 7.8, 1.8 Hz), 7.62 (dd, 1H, *J* = 7.9, 1.8 Hz), 7.53 (d, 1H, *J* = 7.7 Hz), 7.40 (d, 1H, *J* = 7.9 Hz), 7.16-7.12 (m, 2H), 6.95 (d, 1H, *J* = 8.0 Hz), 4.10-4.01 (m, 4H), 1.90-1.80 (m, 4H), 1.54-1.43 (m, 4H), 1.43-1.20 (m, 24H), 0.92-0.84 (m, 6H); <sup>13</sup>C NMR (100 MHz, CDCl<sub>3</sub>): δ [ppm] = 192.6, 149.5, 143.0, 142.6, 141.8, 137.2, 136.1, 134.4, 133.0, 132.5, 127.6, 122.8, 122.7, 121.7, 120.8, 119.4, 114.0, 112.5, 69.5, 69.3, 31.9, 29.7, 29.6, 29.4, 29.4, 29.3, 26.1, 22.7, 14.1.

#### Compound **6**

To a stirred suspension of compound **3** (1.71 g, 2.64 mmol, 1.00 eq.), compound **5** (1.03 g, 2.80 mmol, 1.06 eq.), CuI (6.4 mg, 0.034 mmol, 0.01 eq.), and Pd(PPh<sub>3</sub>)<sub>4</sub> (35 mg, 0.030 mmol, 0.01 eq.) in dry THF (100 mL) was added triethylamine (TEA, 30 mL) under argon atmosphere. The mixture was refluxed for 23 hours. After monitoring the reaction progress by TLC, CuI (5.6 mg, 0.029 mmol, 0.01 eq.), and Pd(PPh<sub>3</sub>)<sub>4</sub> (32 mg, 0.028 mmol, 0.01 eq.) were added. The mixture was further refluxed for 13 hours. After cooling to room temperature, the reaction mixture was filtered to remove the insoluble residue. The volatile components were evaporation under reduced pressure from the filtrate. Then, the resultant residue was purified by silica gel column chromatography (eluent: *n*-hexane/chloroform = 2/1→1/2; v/v) and dried *in vacuo* to afford **6** as an orange solid (1.03 g, 1.10 mmol, 42% yield).

<sup>1</sup>H NMR (400 MHz, CDCl<sub>3</sub>): δ [ppm] = 7.88 (d, 1H, *J* = 1.4 Hz), 7.78 (d, 1H, *J* = 0.88 Hz), 7.70 (dd, 1H, *J* = 7.8, 1.8 Hz), 7.63 (dd, 1H, *J* = 7.7, 1.5 Hz), 7.56 (d, 1H, *J* = 7.8 Hz), 7.52 (d, 1H, *J* = 7.7 Hz), 7.17-7.13 (m, 2H), 7.07 (d, 2H, *J* = 8.8 Hz), 6.96 (d, 1H, *J* = 8.1 Hz), 4.18 (t, 2H, *J* = 6.5 Hz), 4.10-4.02 (m, 4H), 3.62 (t, 2H, *J* = 6.5 Hz), 1.91-1.80 (m, 4H), 1.78 (quintet, 2H, *J* = 7.1 Hz), 1.59-1.21 (m, 34H), 0.90 (s, 9H), 0.92-0.85 (m, 6H), 0.05 (s, 6H); <sup>13</sup>C NMR (100 MHz, CDCl<sub>3</sub>): δ [ppm] = 193.1, 155.6 (dd, *J* = 247.0, 7.1 Hz), 149.5, 149.5, 144.1, 142.7, 142.0, 137.8, 136.8, 135.1, 134.6, 133.0, 132.5, 127.4, 123.2, 122.7, 121.0, 120.3, 119.4, 117.1, 115.6 (dd, *J* = 17.1, 7.3 Hz), 114.0, 112.5, 89.4, 88.8, 77.3, 77.2, 77.0, 76.7, 74.8, 69.6, 69.3, 63.1, 32.7, 31.9, 30.0, 29.7, 29.6, 29.4, 29.4, 29.3, 26.1, 26.0, 25.5, 25.4, 22.7, 18.4, 14.1, -5.3.

#### Compound **7**

TBS-protected compound **6** (888 mg, 0.95 mmol, 1.00 eq.) was dissolved in dry THF (80 mL). After the mixture was cooled in ice bath, a solution of TBAF in THF (ca. 1.0 M, 3.3 mL, 3.50 eq.) was slowly added to the mixture for over 15 minutes at to 0 °C. Then, the mixture was gradually warmed to room temperature and stirred for 16 hours. The product was washed with sat.NH<sub>4</sub>Cl aq. (50 mL ×3), brine (50 mL) and H<sub>2</sub>O (50 mL). The collected organic fractions were combined and dried over Na<sub>2</sub>SO<sub>4</sub>. After filtration and evaporation, the crude product was

recrystallized from THF/methanol, and dried *in vacuo* to afford **7** as an orange solid (739 mg, 0.90 mmol, 95% yield).

<sup>1</sup>H NMR (400 MHz, CDCl<sub>3</sub>): δ [ppm] = 7.88 (d, 1H, *J* = 1.4 Hz), 7.78 (d, 1H, *J* = 0.9 Hz), 7.70 (dd, 1H, *J* = 7.8, 1.8 Hz), 7.62 (dd, 1H, *J* = 7.7, 1.5 Hz), 7.55 (d, 1H, *J* = 7.9 Hz), 7.52 (d, 1H, *J* = 7.7 Hz), 7.18-7.12 (m, 2H), 7.07 (d, 2H, *J* = 8.8 Hz), 6.95 (d, 1H, *J* = 8.1 Hz), 4.18 (t, 2H, *J* = 6.5 Hz), 4.11-4.00 (m, 4H), 3.67 (t, 2H, *J* = 6.5 Hz), 1.91-1.72 (m, 6H), 1.67-1.19 (m, 34H), 0.93-0.83 (m, 6H); <sup>13</sup>C NMR (100 MHz, CDCl<sub>3</sub>): δ [ppm] = 193.1, 155.6 (dd, *J* = 247.2, 6.8 Hz), 149.5, 149.5, 144.1, 142.7, 142.0, 137.8, 136.7, 135.1, 134.6, 133.0, 132.5, 127.4, 123.2, 122.7, 121.0, 120.3, 119.4, 117.2, 115.6 (dd, *J* = 17.2, 7.3 Hz), 114.0, 112.5, 89.4, 88.7, 77.3, 77.2, 77.0, 76.7, 74.8, 69.6, 69.3, 62.9, 32.7, 31.9, 29.9, 29.7, 29.6, 29.4, 29.4, 29.3, 26.1, 25.5, 25.4, 22.7, 14.1.

#### Compound **8**

To a stirred suspension of 2,7-dibromo-9-fluorenone (769 mg, 2.28 mmol, 1.00 eq.), compound **5** (1.99 g, 5.41 mmol, 2.37 eq.), CuI (10 mg, 0.054 mmol, 0.02 eq.), and Pd(PPh<sub>3</sub>)<sub>4</sub> (59 mg, 0.051 mmol, 0.02 eq.) in dry THF (80 mL) was added TEA (80 mL) under argon atmosphere. The mixture was refluxed for 26 hours. After cooling to room temperature, the reaction mixture was filtered to remove the insoluble residue. The volatile components were evaporation under reduced pressure from the filtrate. Then, the resultant residue was purified by silica gel column chromatography (eluent: *n*-hexane/chloroform = 1/1→2/3→1/2; v/v), and dried *in vacuo* to afford **8** as an orange solid (1.62 g, 1.78 mmol, 78% yield).

<sup>1</sup>H NMR (400 MHz, CDCl<sub>3</sub>): δ [ppm] = 7.78 (d, 2H, *J* = 0.8 Hz), 7.64 (dd, 2H, *J* = 7.8, 1.5 Hz), 7.53 (d, 2H, *J* = 7.7 Hz), 7.06 (d, 4H, *J* = 8.8 Hz), 4.18 (t, 4H, *J* = 6.5 Hz), 3.63 (t, 4H, *J* = 6.5 Hz), 1.78 (quintet, 4H, *J* = 7.0 Hz), 1.60-1.34 (m, 12H), 0.90 (s, 18H), 0.05 (s, 12H); <sup>13</sup>C NMR (100 MHz, CDCl<sub>3</sub>): δ [ppm] = 191.9, 155.6 (dd, *J* = 247.2, 6.8 Hz), 143.4, 137.9, 136.9, 134.5, 127.5, 123.9, 120.7, 116.9, 115.7 (dd, *J* = 17.0, 7.4 Hz), 89.2, 89.2, 74.8, 63.1, 32.7, 30.0, 26.0, 25.5, 25.4, 18.4, -5.3.

#### Fluorenone-based D-A-D triad **FL-1**

To a stirred solution of compound **7** (687 mg, 0.84 mmol, 1.00 eq.) in dry THF (20 mL) were added hexyl isocyanate (0.3 mL, 2.08 mmol) at room temperature. Then, dibutyltin dilaurate (0.1 mL, 0.17 mmol) was immediately added to the reaction mixture under argon atmosphere. The reaction mixture was stirred for 16 hours at room temperature. The crude product was extracted with chloroform (100 mL) and washed with H<sub>2</sub>O (100 mL ×3). The collected organic fractions were combined and dried over Na<sub>2</sub>SO<sub>4</sub>. After filtration and evaporation, the product was recrystallized from THF and *n*-hexane with small amount of methanol, and dried *in vacuo* to afford **FL-1** as an orange solid (680 mg, 0.17 mmol, 85% yield).

<sup>1</sup>H NMR (400 MHz, CDCl<sub>3</sub>): δ [ppm] = 7.88 (d, 1H, *J* = 1.4 Hz), 7.78 (d, 1H, *J* = 1.5 Hz), 7.70 (dd, 1H, *J* = 7.8, 1.8 Hz), 7.63 (dd, 1H, *J* = 7.7, 1.5 Hz), 7.56 (d, 1H, *J* = 7.8 Hz), 7.53 (d, 1H, *J* = 7.8 Hz), 7.18-7.12 (m, 2H), 7.07 (d, 2H, *J* = 8.8 Hz), 6.96 (d, 1H, *J* = 8.2 Hz), 4.61 (s, 1H), 4.18 (t, 2H, *J* = 6.4 Hz), 4.12-4.01 (m, 6H), 3.21-3.10 (m, 2H), 1.91-1.74 (m, 6H), 1.71-1.59 (m, 2H), 1.54-1.21 (m, 40H), 0.93-0.84 (m, 9H); <sup>13</sup>C NMR (100 MHz, CDCl<sub>3</sub>): δ [ppm] = 193.1, 156.8, 155.6 (dd, *J* = 247.1, 7.0 Hz), 154.4, 154.3, 149.5, 149.5, 144.1, 142.7, 142.0, 137.8, 136.7, 135.1, 134.6, 133.0, 132.5, 127.3, 123.2, 12, , 121.0, 120.3, 119.4, 117.2, 115.6 (dd, *J* = 17.1, 7.3 Hz), 114.0, 112.5, 89.4, 88.7, 77.3, 77.2, 77.0, 76.7, 74.7, 69.6, 69.3, 64.7, 41.0, 31.9, 31.5, 30.0, 29.9, 29.7, 29.6, 29.5, 29.4, 29.3, 29.0, 26.4, 26.1, 25.6, 25.4, 22.7, 22.6, 14.1, 14.0; HRMS (ESI): molecular weight: 948.2898 (C<sub>60</sub>H<sub>79</sub>F<sub>2</sub>NO<sub>6</sub>); m/z calcd. for [C<sub>60</sub>H<sub>80</sub>F<sub>2</sub>NO<sub>6</sub>]<sup>+</sup>: 948.5948 ([M+H]<sup>+</sup>); found. 948.5949.

#### Fluorenone-based D-A-D triad **FL-2**

To a stirred solution of compound **9** (621 mg, 0.81 mmol, 1.00 eq.) in dry THF (60 mL) were added hexyl isocyanate (0.6 mL, 4.43 mmol) at room temperature. Then, dibutyltin dilaurate (0.2 mL, 0.37 mmol) was immediately added to the reaction mixture under argon atmosphere. The reaction mixture was stirred for 20 hours at room temperature. The crude product was extracted with chloroform (100 mL) and washed with H<sub>2</sub>O (100 mL ×3). The collected organic fractions were combined and dried over Na<sub>2</sub>SO<sub>4</sub>. After filtration and evaporation, the

product was recrystallized from THF and methanol, and dried *in vacuo* to afford **FL-2** as a yellow solid (744 mg, 0.79 mmol, 87% yield).

$^1\text{H}$  NMR (400 MHz,  $\text{CDCl}_3$ ):  $\delta$  [ppm] = 7.79 (d, 2H,  $J$  = 0.9 Hz), 7.64 (dd, 2H,  $J$  = 7.7, 1.5 Hz), 7.54 (d, 2H,  $J$  = 7.8 Hz), 7.07 (d, 4H,  $J$  = 8.7 Hz), 4.62 (s, 2H), 4.18 (t, 4H,  $J$  = 6.4 Hz), 4.06 (t, 4H,  $J$  = 6.5 Hz), 3.24-3.04 (m, 4H), 1.78 (quintet, 4H,  $J$  = 7.0 Hz), 1.72-1.59 (m, 4H), 1.56-1.22 (m, 24H), 0.88 (t, 6H,  $J$  = 6.8 Hz);  $^{13}\text{C}$  NMR (100 MHz,  $\text{CDCl}_3$ ):  $\delta$  [ppm] = 191.9, 155.6, 143.5, 137.9, 136.8, 134.5, 127.5, 124.0, 120.7, 117.1, 115.7, 89.2, 89.2, 74.7, 64.7, 41.1, 31.5, 30.0, 29.9, 29.0, 26.4, 25.6, 25.4, 22.6, 14.0; HRMS (ESI): molecular weight: 939.1016 ( $\text{C}_{55}\text{H}_{62}\text{F}_4\text{N}_2\text{O}_7$ );  $m/z$  calcd. for  $[\text{C}_{55}\text{H}_{63}\text{F}_4\text{N}_2\text{O}_7]^+$ : 939.4566 ( $[\text{M}+\text{H}]^+$ ); found. 939.4566.

## S-2. Gelation Properties

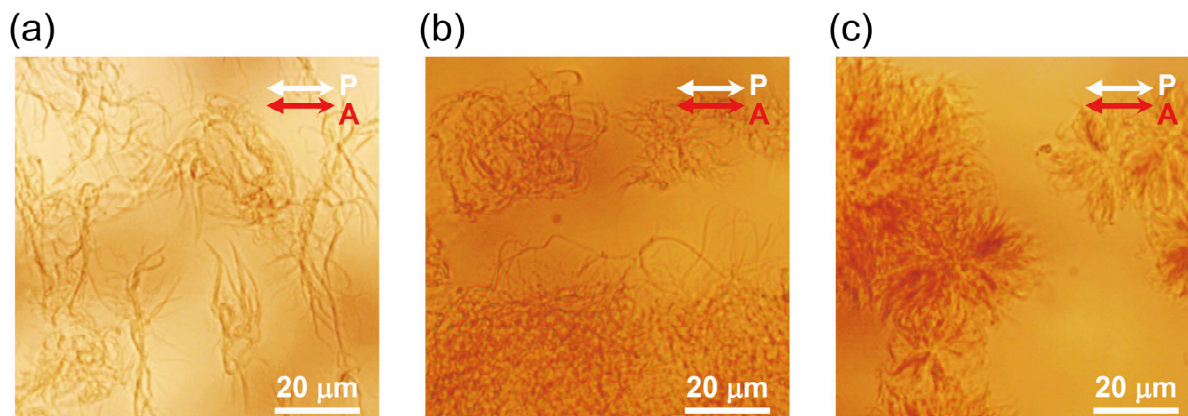

**Fig. S1** POM images of organogels composed of **FL-1** in the open nicol arrangement: (a) *n*-decane gel (20 g L<sup>-1</sup>), (b) *n*-dodecane gel (20 g L<sup>-1</sup>), and (c) DB gel (50 g L<sup>-1</sup>). The images were adjusted the brightness and contrast on equal terms in order to improve visibility.

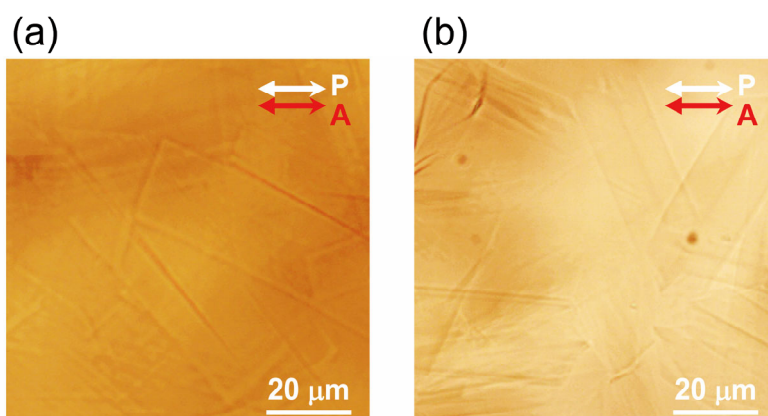

**Fig. S2** POM images of organogels composed of **FL-2** in the open nicol arrangement: (a) DB gel (20 g L<sup>-1</sup>), and (b) DES gel (50 g L<sup>-1</sup>). The images were adjusted the brightness and contrast on equal terms in order to improve visibility.

### S-3. Liquid-Crystalline Properties

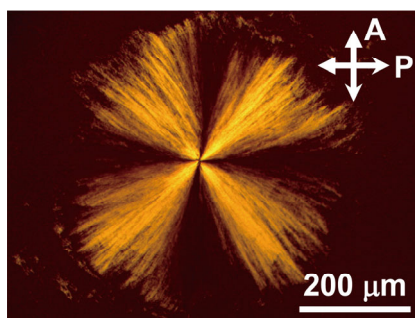

Fig. S3 A POM image of FL-1 in the Cr<sub>2</sub> phase (25 °C).

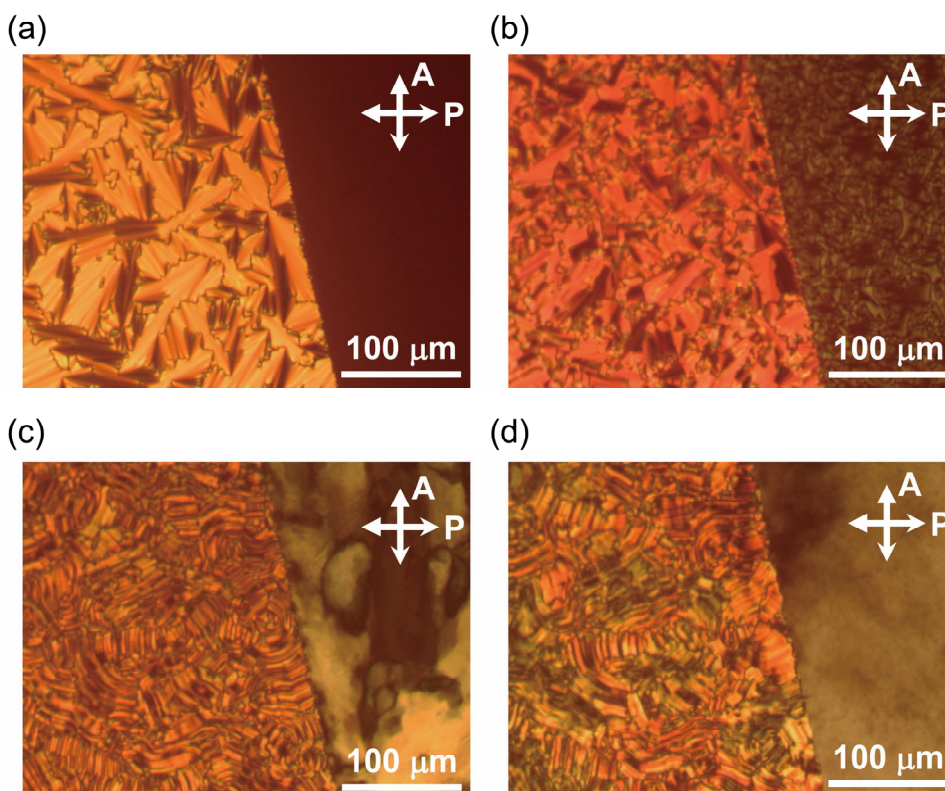

Fig. S4 POM images of FL-2 in the (a) S<sub>A</sub> phase (170 °C), (b) S<sub>C</sub> phase (150 °C), (c) M phase (135 °C), and (d) Cr<sub>2</sub> phases (100 °C) on cooling process.

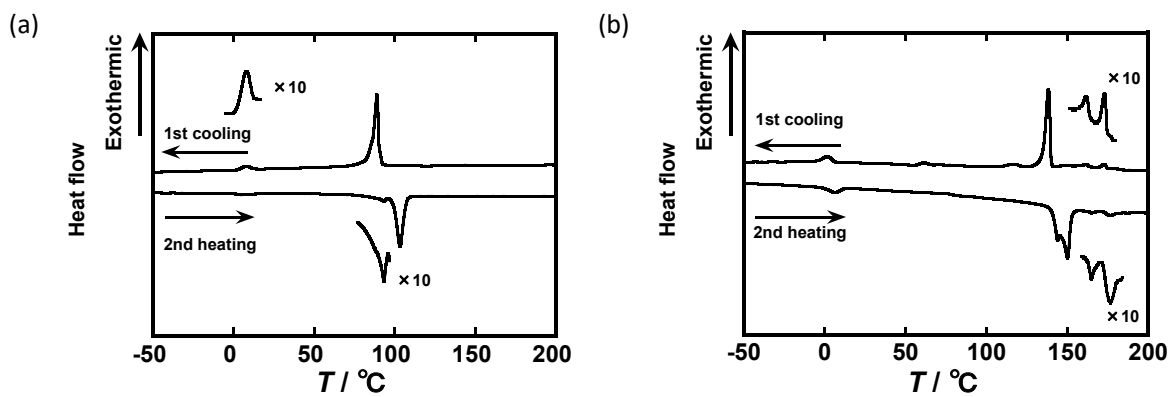

Fig. S5 DSC thermograms of (a) FL-1 and (b) FL-2. The scanning rates are 10 °C min<sup>-1</sup>.

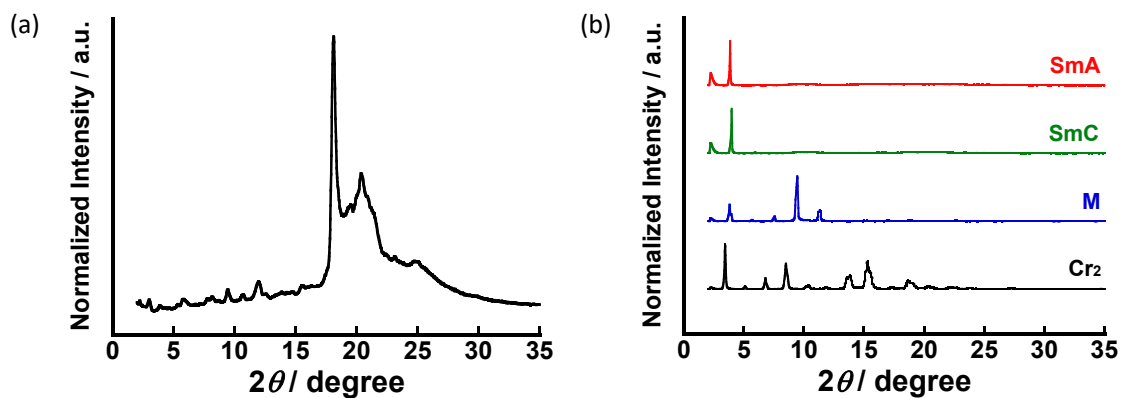

Fig. S6 Variable temperature XRD profiles of (a) FL-1 at room temperature and (b) FL-2 at the appropriate temperature.

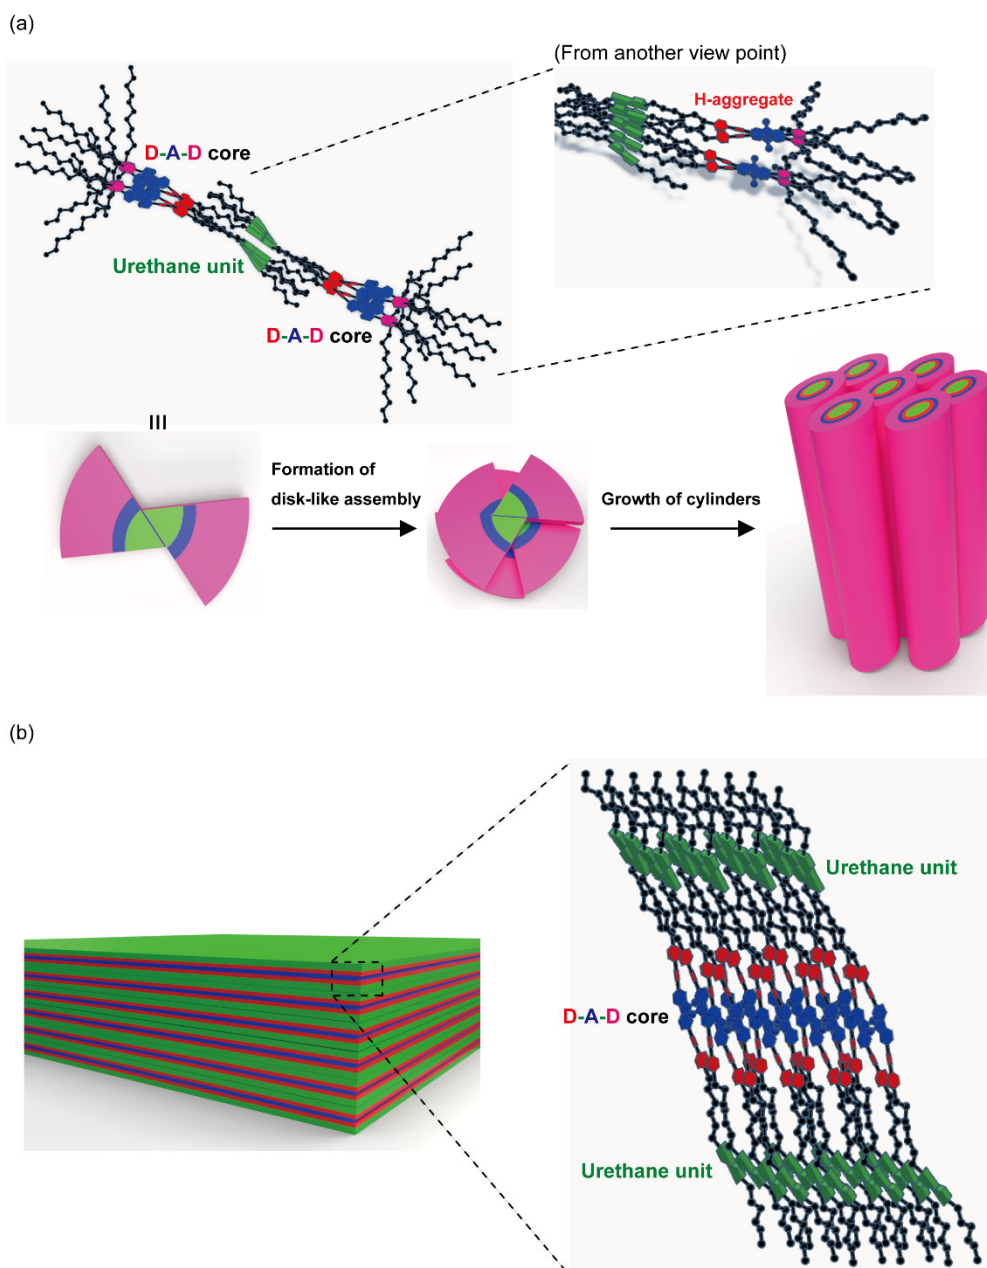

Fig. S7 Schematic illustrations of one of the possible molecular packing in the high-ordered phases of (a) FL-1 and (b) FL-2.

## S-4. Intermolecular Hydrogen Bonding

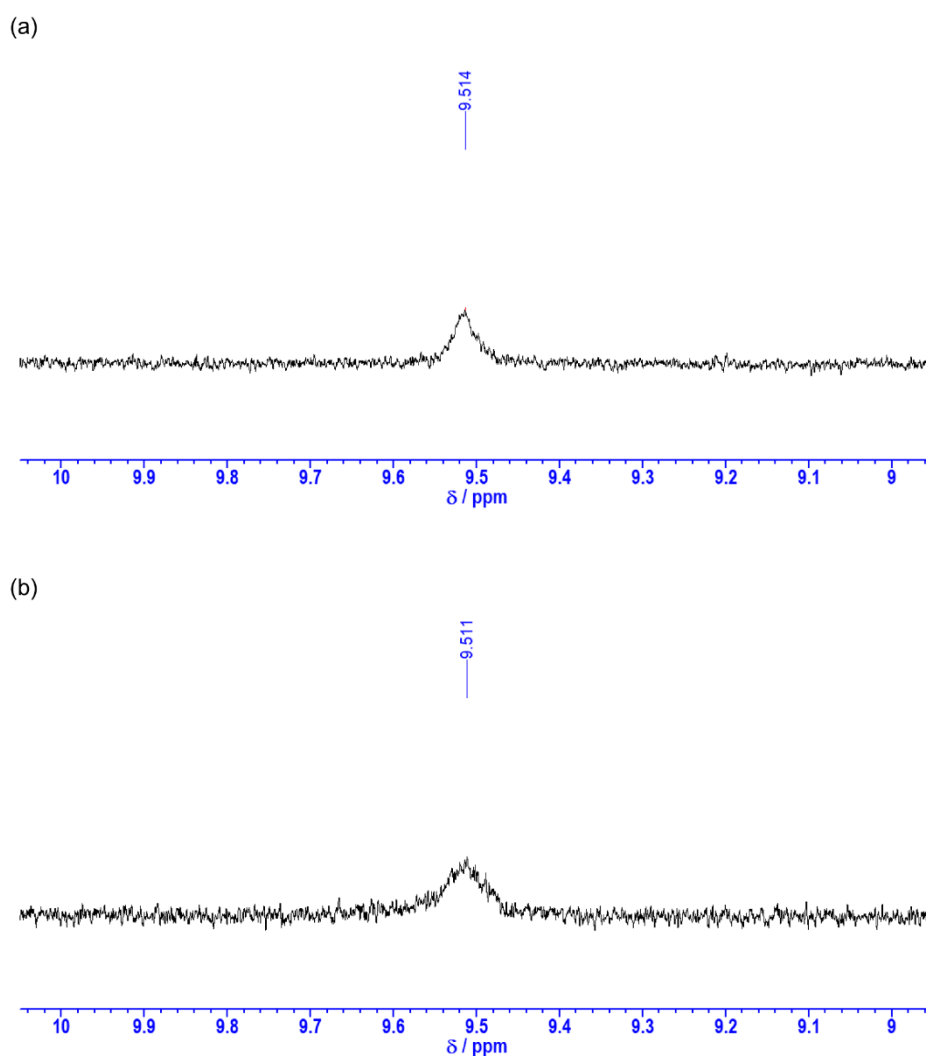

**Fig. S8**  $^1\text{H}$  NMR spectra of (a) FL-1, and (b) FL-2 in  $\text{DMSO-}d_6/\text{CDCl}_3$  (5/1; v/v).

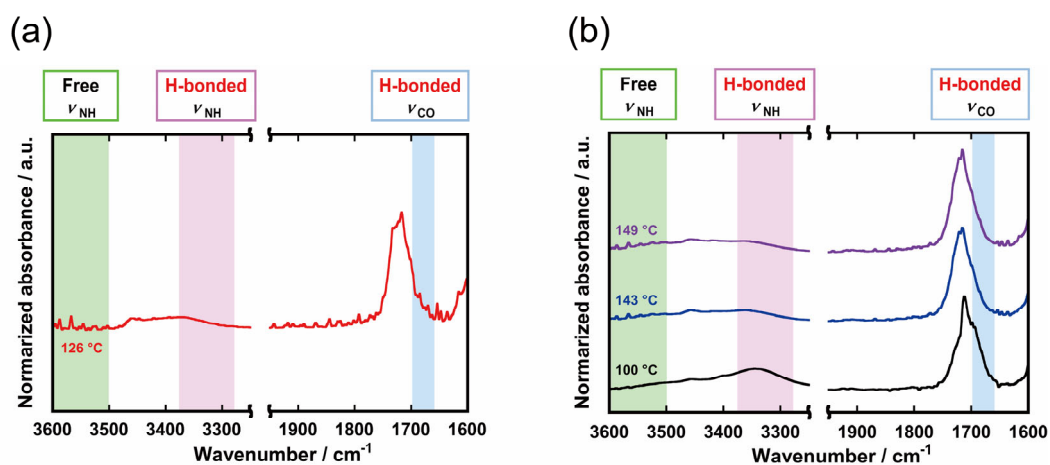

**Fig. S9** Variable temperature FT-IR spectra of the films of (a) FL-1 in the IL phase (126 °C), and (b) FL-2 in the  $S_C$  phase (149 °C), M phase (143 °C) and  $Cr_2$  phase (100 °C) on cooling process.



## S-5. Density functional theory (DFT) calculations

The density functional theory (DFT) calculations were carried out by using a Gaussian R 09W (Version 9.5) software.<sup>53</sup> The accompanied Gauss View 5.0 software was used for visualization of calculation results. The calculation for the analogues of the fluorenone-based D–A–D triads **FL-1** and **FL-2** at the electrically neutral state were based on the generalized gradient approximation B3LYP functional,<sup>54,55</sup> in conjunction with a 6-31G(d,p) basis set.<sup>56,57</sup> To avoid the overestimation of the extent of wave function delocalization by DFT methods, initial molecular geometries for the DFT calculations were optimized by energy minimization on the basis of molecular mechanics calculation (MMFF94) with Avogadro (Version 1.2.0) software. All flexible side chains of **FL-1** and **FL-2** were replaced with short alkyl groups to reduce computational burden.

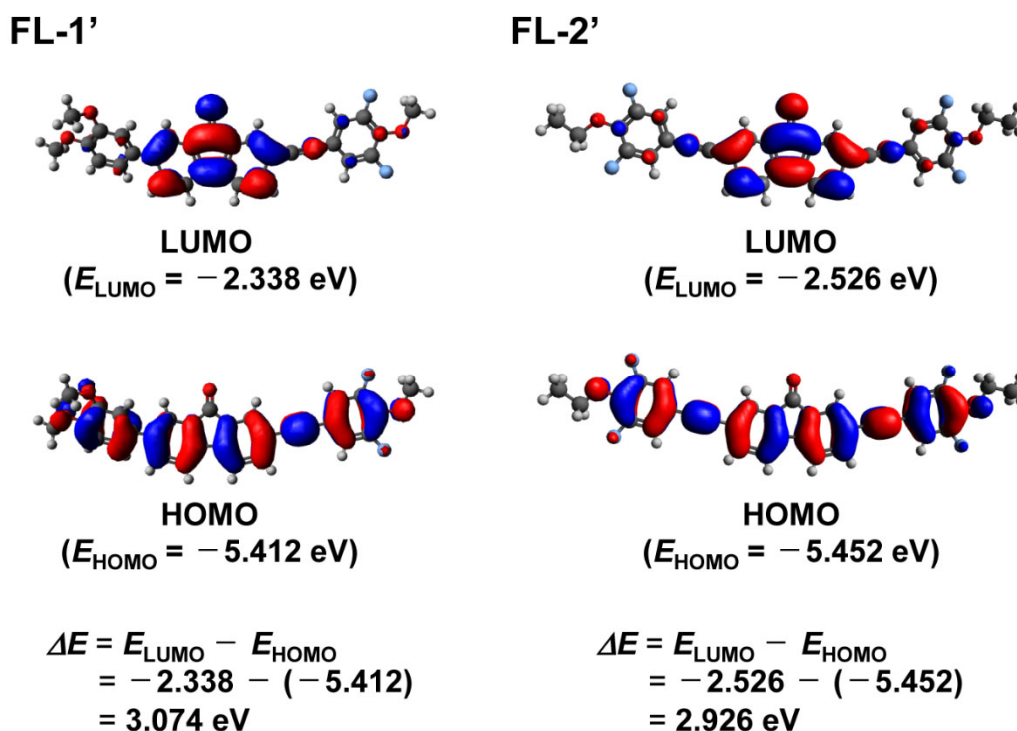

**Fig. S10** HOMO and LUMO distributions and estimated energy levels for analogous molecules of **FL-1** and **FL-2** by DFT calculation at the B3LYP/6-31G(d,p) level.

## S-6. Absorption and Photoluminescent Properties

**Table S1** Absorption and photoluminescent properties of **FL-1** and **FL-2** in various solvents.

| Solvent                                     | FL-1                                                                                |                                                |                   | FL-2                                                                                |                                                |                   |
|---------------------------------------------|-------------------------------------------------------------------------------------|------------------------------------------------|-------------------|-------------------------------------------------------------------------------------|------------------------------------------------|-------------------|
|                                             | $\lambda_{\text{abs}} / \text{nm}$<br>( $\epsilon / \text{M}^{-1} \text{cm}^{-1}$ ) | $\lambda_{\text{em}} / \text{nm}$ <sup>a</sup> | PLQY <sup>b</sup> | $\lambda_{\text{abs}} / \text{nm}$<br>( $\epsilon / \text{M}^{-1} \text{cm}^{-1}$ ) | $\lambda_{\text{em}} / \text{nm}$ <sup>a</sup> | PLQY <sup>b</sup> |
| <i>n</i> -Hexane / Chloroform<br>(9/1; v/v) | 299 (6.6×10 <sup>4</sup> )                                                          | 404                                            | 0.071             | 299 (6.9×10 <sup>4</sup> )                                                          | 383                                            | 0.195             |
|                                             | 345 (4.8×10 <sup>4</sup> )                                                          | 581                                            |                   | 350 (5.9×10 <sup>4</sup> )                                                          | 402                                            |                   |
|                                             | 442 (4.4×10 <sup>3</sup> )                                                          |                                                |                   | 431 (5.8×10 <sup>3</sup> )                                                          | 546                                            |                   |
| Toluene                                     | 303 (5.4×10 <sup>4</sup> )                                                          | 428                                            | 0.234             | 302 (5.6×10 <sup>4</sup> )                                                          | 387                                            | 0.489             |
|                                             | 348 (4.3×10 <sup>4</sup> )                                                          | 567                                            |                   | 354 (5.4×10 <sup>4</sup> )                                                          | 409                                            |                   |
|                                             | 448 (4.0×10 <sup>3</sup> )                                                          |                                                |                   | 437 (5.5×10 <sup>3</sup> )                                                          | 537                                            |                   |
| THF                                         | 302 (6.2×10 <sup>4</sup> )                                                          | 420                                            | 0.164             | 302 (7.3×10 <sup>4</sup> )                                                          | 381                                            | 0.464             |
|                                             | 349 (4.6×10 <sup>4</sup> )                                                          | 581                                            |                   | 352 (6.1×10 <sup>4</sup> )                                                          | 402                                            |                   |
|                                             | 448 (4.2×10 <sup>3</sup> )                                                          |                                                |                   | 435 (5.7×10 <sup>3</sup> )                                                          | 537                                            |                   |
| Ethyl acetate                               | 300 (6.4×10 <sup>4</sup> )                                                          | 419                                            | 0.171             | 301 (7.7×10 <sup>4</sup> )                                                          | 385                                            | 0.394             |
|                                             | 345 (4.6×10 <sup>4</sup> )                                                          | 581                                            |                   | 350 (6.2×10 <sup>4</sup> )                                                          | 540                                            |                   |
|                                             | 448 (4.2×10 <sup>3</sup> )                                                          |                                                |                   | 438 (5.5×10 <sup>3</sup> )                                                          |                                                |                   |
| Chloroform                                  | 303 (6.4×10 <sup>4</sup> )                                                          | 435                                            | 0.013             | 304 (7.1×10 <sup>4</sup> )                                                          | 391                                            | 0.074             |
|                                             | 348 (4.5×10 <sup>4</sup> )                                                          | 620                                            |                   | 353 (5.7×10 <sup>4</sup> )                                                          | 572                                            |                   |
|                                             | 450 (3.7×10 <sup>3</sup> )                                                          |                                                |                   | 445 (5.0×10 <sup>3</sup> )                                                          |                                                |                   |
| <i>N,N</i> -Dimethylformamide<br>(DMF)      | 304 (5.7×10 <sup>4</sup> )                                                          |                                                | 0.021             | 305 (6.6×10 <sup>4</sup> )                                                          | 383                                            | 0.211             |
|                                             | 349 (4.2×10 <sup>4</sup> )                                                          | 452                                            |                   | 354 (5.6×10 <sup>4</sup> )                                                          | 401                                            |                   |
|                                             | 454 (3.7×10 <sup>3</sup> )                                                          |                                                |                   | 441 (4.9×10 <sup>3</sup> )                                                          | 555                                            |                   |
| Acetonitrile / Chloroform<br>(9/1; v/v)     | 301 (6.7×10 <sup>4</sup> )                                                          | 452                                            | 0.025             | 302 (7.8×10 <sup>4</sup> )                                                          | 396                                            | 0.131             |
|                                             | 346 (4.7×10 <sup>4</sup> )                                                          | 623                                            |                   | 352 (6.2×10 <sup>4</sup> )                                                          | 563                                            |                   |
|                                             | 448 (3.8×10 <sup>3</sup> )                                                          |                                                |                   | 436 (5.2×10 <sup>3</sup> )                                                          |                                                |                   |
| Ethanol / Chloroform<br>(9/1; v/v)          | 301 (6.8×10 <sup>4</sup> )                                                          |                                                | 0.015             | 303 (8.1×10 <sup>4</sup> )                                                          | 396                                            | 0.014             |
|                                             | 346 (4.5×10 <sup>4</sup> )                                                          | 435                                            |                   | 351 (6.3×10 <sup>4</sup> )                                                          | 601                                            |                   |
|                                             | 448 (3.3×10 <sup>3</sup> )                                                          |                                                |                   | 437 (5.1×10 <sup>3</sup> )                                                          |                                                |                   |

a) The photoexcitation at the absorption maximum around 350 nm.

b) The excitation wavelength is 365 nm.

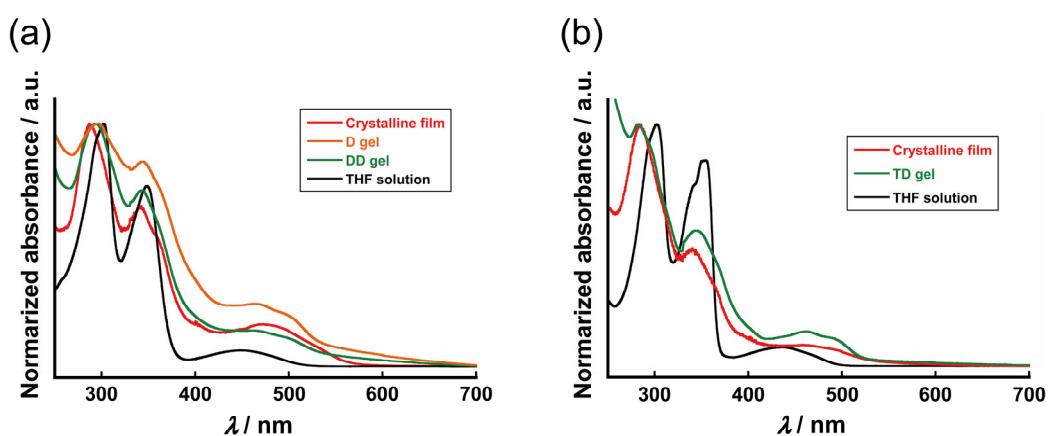

**Fig. S11** UV-Vis spectra of (a) **FL-1** and (b) **FL-2** in the THF solution, organogels and crystalline films.

**Table S2** Absorption and photoluminescent properties of organogels of **FL-1** and **FL-2**.

| Solvent                              | <b>FL-1</b>                        |                                              | <b>FL-2</b>                        |                                              |
|--------------------------------------|------------------------------------|----------------------------------------------|------------------------------------|----------------------------------------------|
|                                      | $\lambda_{\text{abs}} / \text{nm}$ | $\lambda_{\text{em}} / \text{nm}^{\text{a}}$ | $\lambda_{\text{abs}} / \text{nm}$ | $\lambda_{\text{em}} / \text{nm}^{\text{a}}$ |
| THF solution (10 $\mu\text{M}$ )     | 302, 349, 448                      | 420, 581                                     | 302, 352, 435                      | 381, 402, 537                                |
| Toluene solution (10 $\mu\text{M}$ ) | 303, 348, 448                      | 428, 567                                     | 302, 354, 437                      | 387, 409, 537                                |
| Crystalline film                     | 287, 343, 473                      | –                                            | 285, 341, 458                      | –                                            |
| <i>D</i> gel                         | 297, 345, 466                      | 570                                          | –                                  | –                                            |
| <i>DD</i> gel                        | 293, 343, 465                      | 569                                          | –                                  | –                                            |
| <i>DB</i> gel                        | 298, 346, 468                      | 571                                          | 285, 343, 459                      | 554                                          |
| <i>TD</i> gel                        | –                                  | –                                            | 283, 345, 463                      | –                                            |

a) The photoexcitation at the absorption maximum around 365 nm.

b) The excitation wavelength is 365 nm.

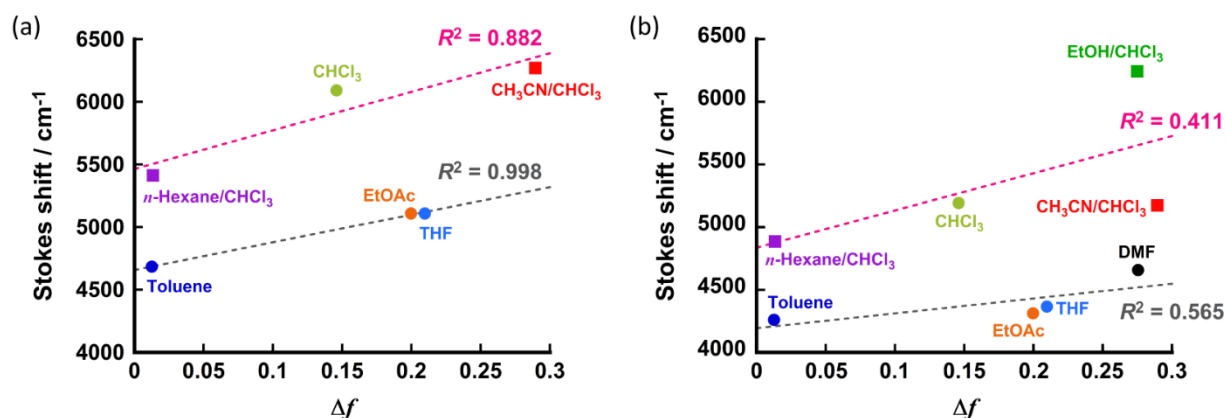

**Fig. S12** Lippert-Mataga plots for (a) FL-1 and (b) FL-2. The value of  $\Delta f$  as a parameter for orientational polarity was determined by  $f(\varepsilon) - f(n)$ .<sup>58</sup> Each value of  $f(\varepsilon)$  and  $f(n)$  of the mixed solvents were determined as weighted average values of  $f(\varepsilon)$  and  $f(n)$  for the constituent solvents, respectively. The Stokes shift was determined as the difference between wavenumbers of CT absorption and emission maxima ( $\nu_{\text{abs, CT}} - \nu_{\text{em, TICT}}$ ).

**Table S3** Fluorescence lifetime of FL-1 and FL-2 in various solvents.

| Solvent                                     | FL-1                                 |                                        | FL-2                                 |                          |
|---------------------------------------------|--------------------------------------|----------------------------------------|--------------------------------------|--------------------------|
|                                             | $\lambda_{\text{det}} / \text{nm}^a$ | $\tau / \text{ns}^b$                   | $\lambda_{\text{det}} / \text{nm}^a$ | $\tau / \text{ns}^b$     |
| <i>n</i> -Hexane / Chloroform<br>(9/1; v/v) | 400                                  | 0.56 (0.21) <sup>c</sup> , 1.26 (0.79) | 385                                  | 0.72 (1.00)              |
|                                             | 580                                  | 1.52 (0.80), 2.36 (0.20)               | 400                                  | 0.78 (1.00)              |
|                                             |                                      |                                        | 550                                  | 0.90 (0.09), 4.33 (0.91) |
| Toluene                                     | 430                                  | 1.22 (1.00)                            | 410                                  | 0.72 (1.00)              |
|                                             | 565                                  | 0.85 (0.07), 5.45 (0.93)               | 535                                  | 1.26 (0.11), 8.63 (0.89) |
| THF                                         | 420                                  | 1.49 (1.00)                            |                                      |                          |
|                                             | 580                                  | 1.55 (0.12), 4.22 (0.88)               | 540                                  | 1.37 (0.07), 9.46 (0.93) |
| Ethyl acetate                               | 420                                  | 1.31 (1.00)                            | 390                                  | 0.83 (1.00)              |
|                                             | 580                                  | 2.68 (0.39), 4.05 (0.61)               | 540                                  | 1.02 (0.07), 9.10 (0.93) |
| Chloroform                                  | 440                                  | 1.21 (0.54), 1.85 (0.49)               | 390                                  | 0.83 (1.00)              |
|                                             | 620                                  | 0.58 (1.00)                            | 570                                  | 1.45 (0.79), 1.98 (0.21) |
| <i>N,N</i> -Dimethylformamide (DMF)         | 450                                  | 0.70 (0.41), 2.67 (0.59)               | 400                                  | 0.83 (0.46), 1.08 (0.54) |
|                                             |                                      |                                        | 555                                  | 1.50 (0.09), 5.54 (0.91) |
| Acetonitrile / Chloroform<br>(9/1; v/v)     | 450                                  | 2.55 (1.00)                            | 400                                  | 0.94 (0.97), 1.90 (0.03) |
|                                             | 620                                  | 0.22 (0.99), 2.84 (0.01)               | 560                                  | 1.36 (0.12), 3.22 (0.88) |
| Ethanol / Chloroform<br>(9/1; v/v)          | 435                                  | 0.37 (0.54), 1.77 (0.46)               | 400                                  | 1.00 (1.00)              |

a) Detection wavelength.

b) The excitation wavelength is 365 nm.

c) The values in parentheses are amplitudes of exponential decay components.

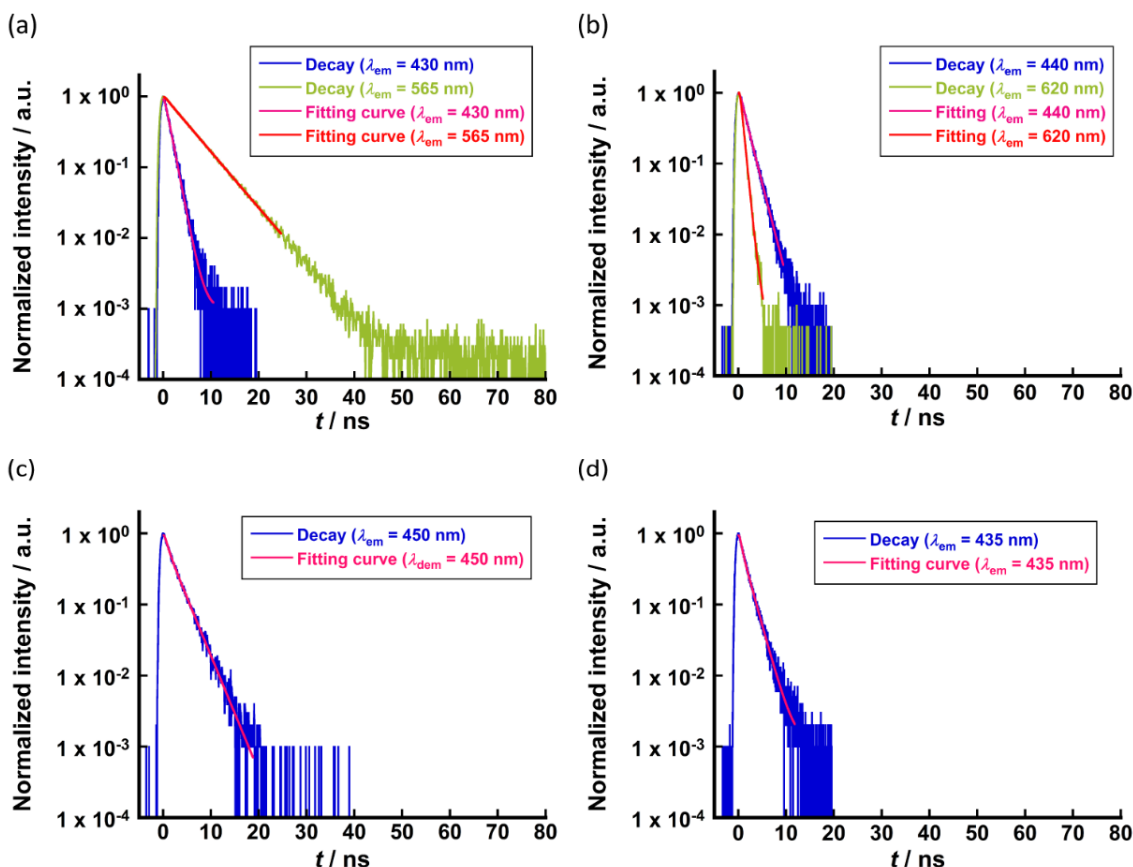

**Fig. S13** Emission decay profiles of FL-1 in solutions (10 mM) diluted by (a) toluene, (b) chloroform, (c) DMF and (d) ethanol / chloroform (9/1; v/v). The excitation wavelength is 365 nm.

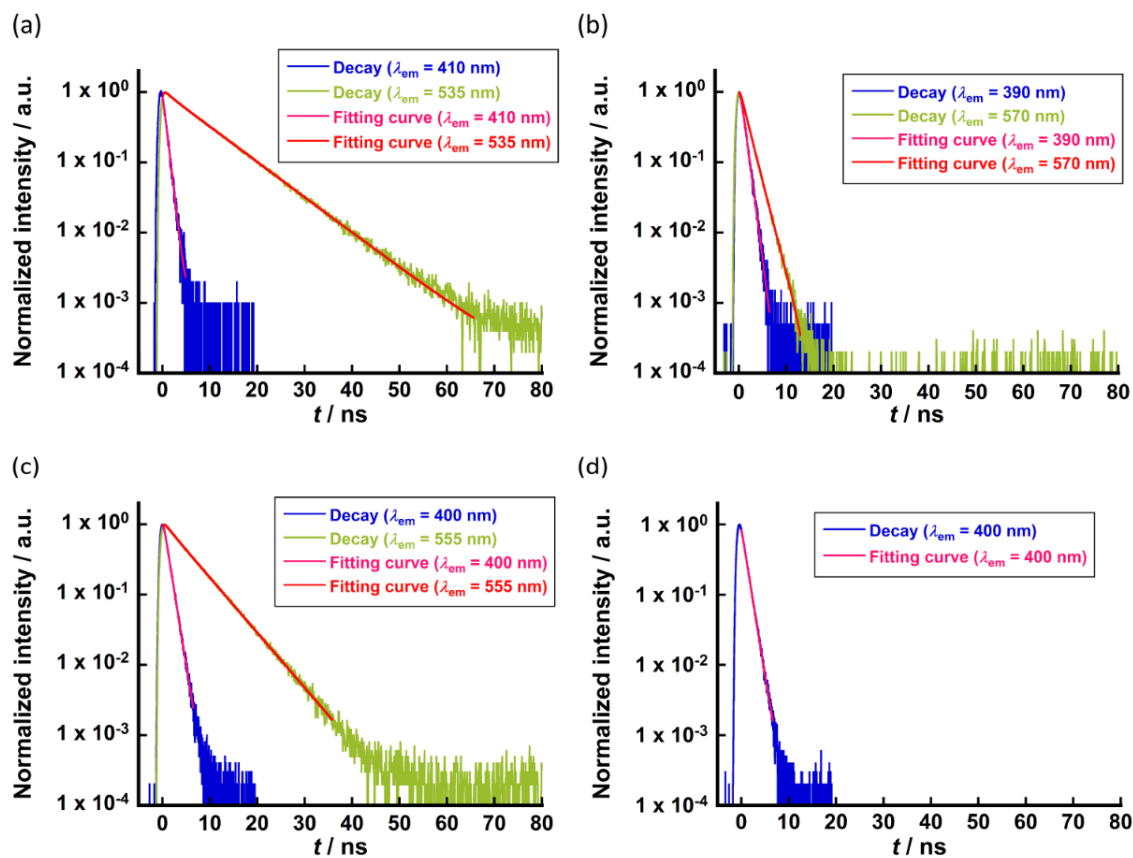

**Fig. S14** Emission decay profiles of FL-2 in solutions (10 mM) diluted by (a) toluene, (b) chloroform, (c) DMF and (d) ethanol / chloroform (9/1; v/v). The excitation wavelength is 365 nm.

## S-7. Acid-Responsive Behaviours

**Table S4** Acid-responsive fluorescent behaviours of FL-1 and FL-2 in the toluene solution.

| Sample                                         | <i>D</i> gel of FL-1 | <i>DB</i> gel of FL-2 |
|------------------------------------------------|----------------------|-----------------------|
|                                                | PLQY <sup>a</sup>    | PLQY <sup>a</sup>     |
| Initial toluene solution (10 $\mu$ M)          | 0.234                | 0.489                 |
| TFA (10 <sup>4</sup> eq.)-added solution       | 0.014                | 0.033                 |
| TEA (10 <sup>4</sup> eq.)-neutralized solution | 0.080                | 0.260                 |

a) The excitation wavelength is 365 nm.

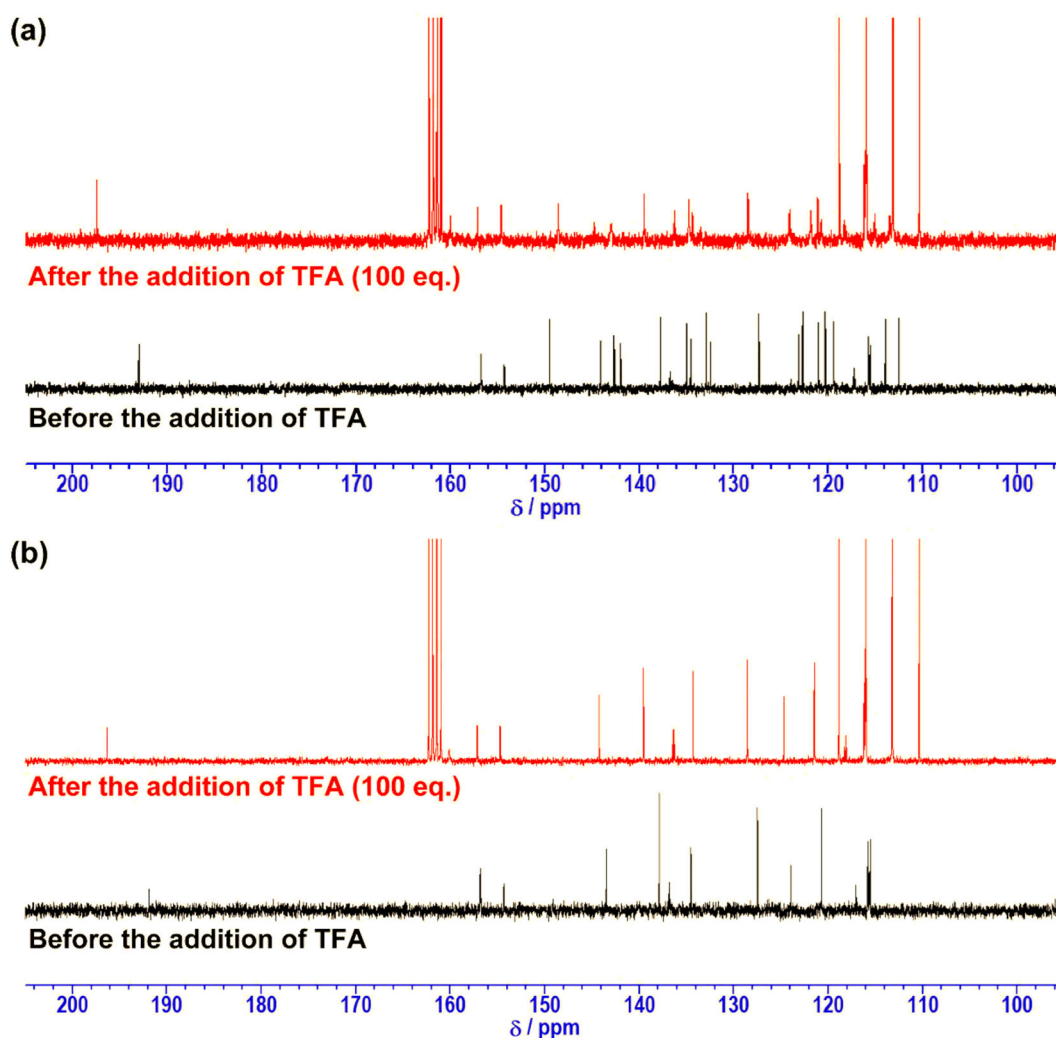

**Fig. S15** Variations in <sup>13</sup>C NMR spectra of (a) FL-1 and (b) FL-2 when an excess amount of TFA (100 eq.) was added to the solution in CDCl<sub>3</sub>.

**Table S5** Acid-responsive fluorescent behaviours of **FL-1** and **FL-2** in organogel states.

| Sample                       | <i>D</i> gel of <b>FL-1</b> |                                               |                                        | <i>DB</i> gel of <b>FL-2</b> |                                               |                                        |
|------------------------------|-----------------------------|-----------------------------------------------|----------------------------------------|------------------------------|-----------------------------------------------|----------------------------------------|
|                              | PLQY <sup>a</sup>           | $\lambda_{\text{det}} / \text{nm}^{\text{b}}$ | $\tau / \text{ns}^{\text{a}}$          | PLQY <sup>a</sup>            | $\lambda_{\text{det}} / \text{nm}^{\text{b}}$ | $\tau / \text{ns}^{\text{a}}$          |
| Initial                      | 0.139                       | 550                                           | 2.69 (0.08) <sup>c</sup> , 9.30 (0.92) | 0.198                        | 550                                           | 6.97 (0.33) <sup>c</sup> , 13.9 (0.67) |
| Acidified by TFA (1.0 eq.)   | 0.058                       | 590                                           | 4.68 (0.18), 8.01 (0.82)               | 0.221                        | 550                                           | 5.93 (0.12), 12.2 (0.88)               |
| Neutralized by TEA (1.0 eq.) | 0.140                       | 550                                           | 3.11 (0.09), 9.21 (0.91)               | 0.209                        | 550                                           | 8.98 (0.27), 13.9 (0.73)               |

a) The excitation wavelength is 365 nm.

b) Detection wavelength.

c) The values in parentheses are amplitudes of exponential decay components.

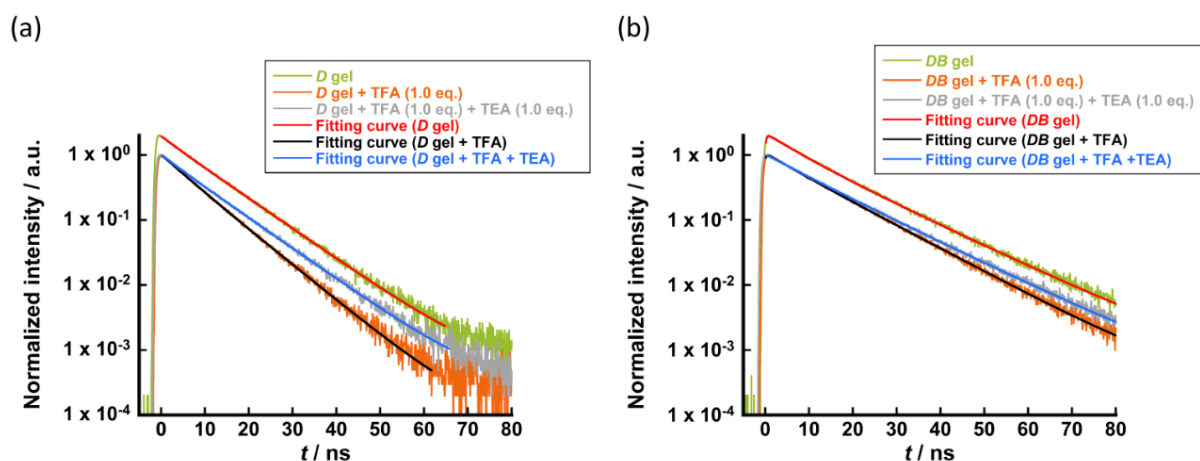

**Fig. S16** Variations in emission decay profiles for (a) *D* gel of **FL-1** and (b) *DB* gel of **FL-2** after the addition of TFA (1.0 eq.) and following neutralization by TEA (1.0 eq.). The excitation wavelength was 365 nm. The emission decays were monitored at the wavelength shown in Table S4.

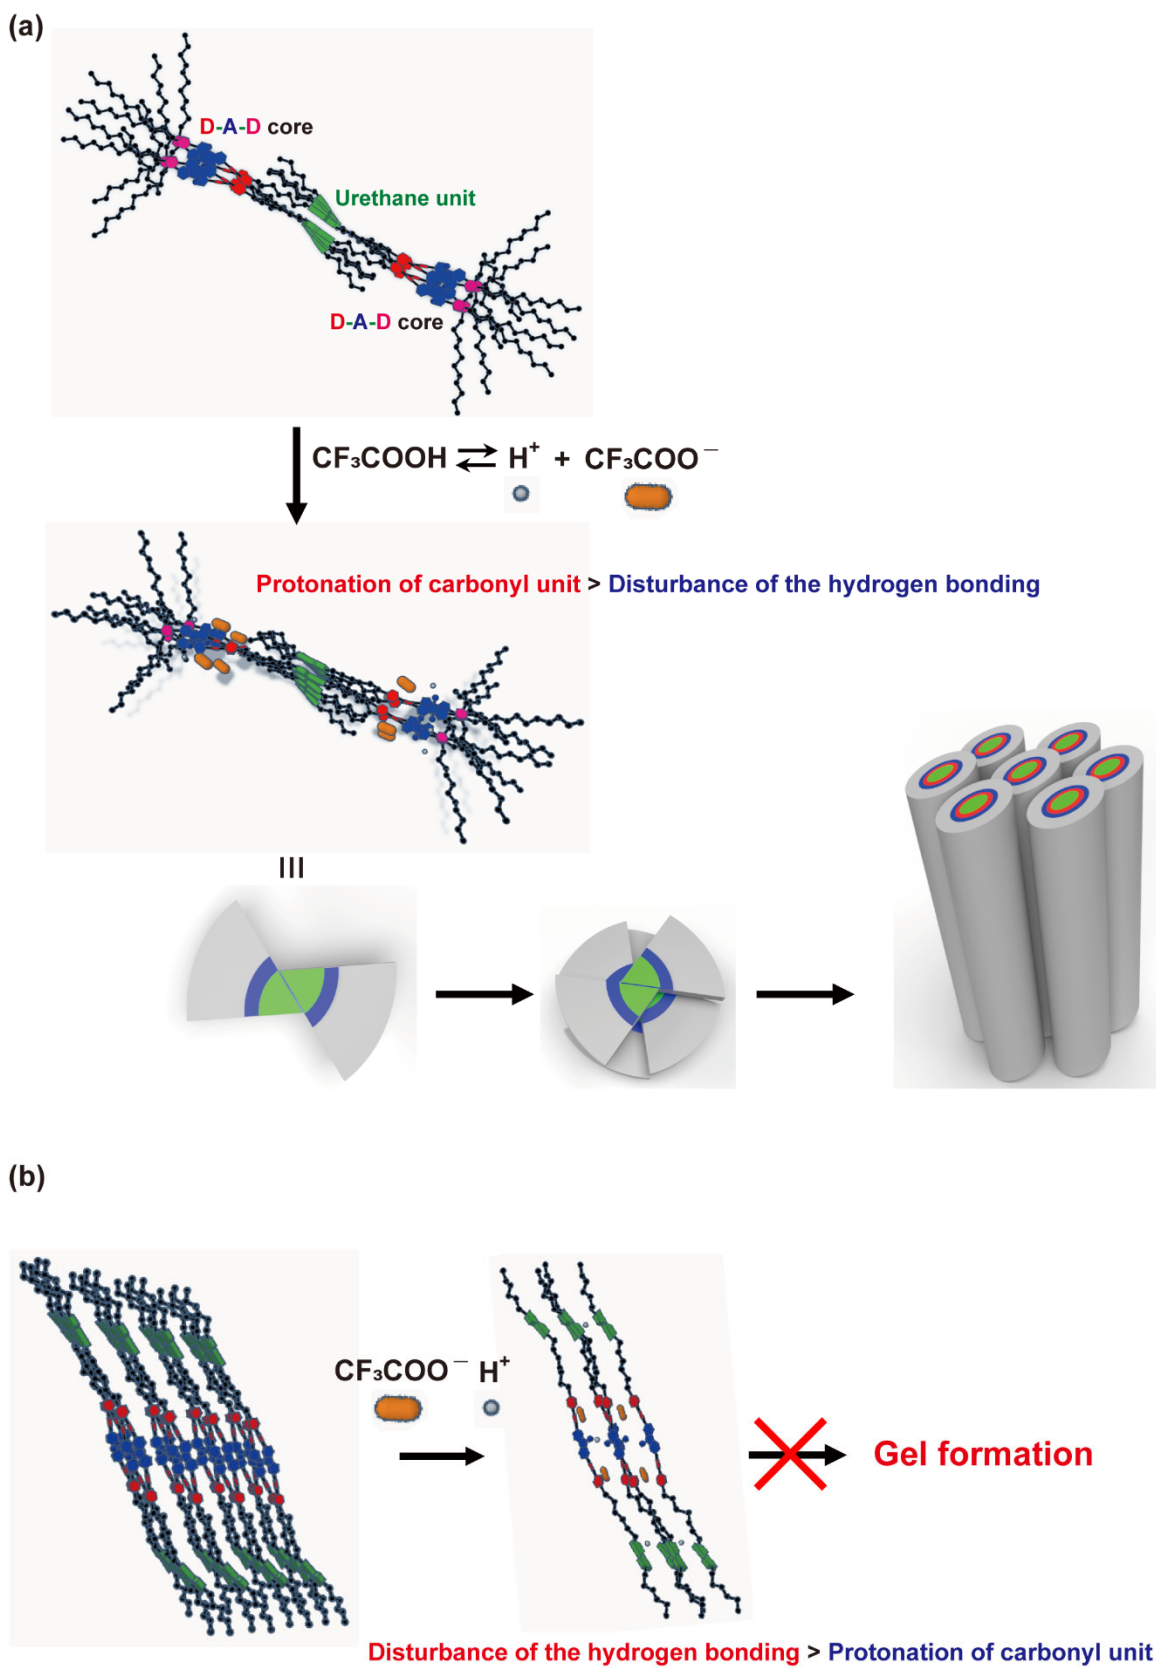

Fig. S17 Schematic illustrations of distinct TFA-responsive behaviors in organogels of (a) FL-1 and (b) FL-2.



## S-8. $^1\text{H}$ and $^{13}\text{C}$ NMR Spectra

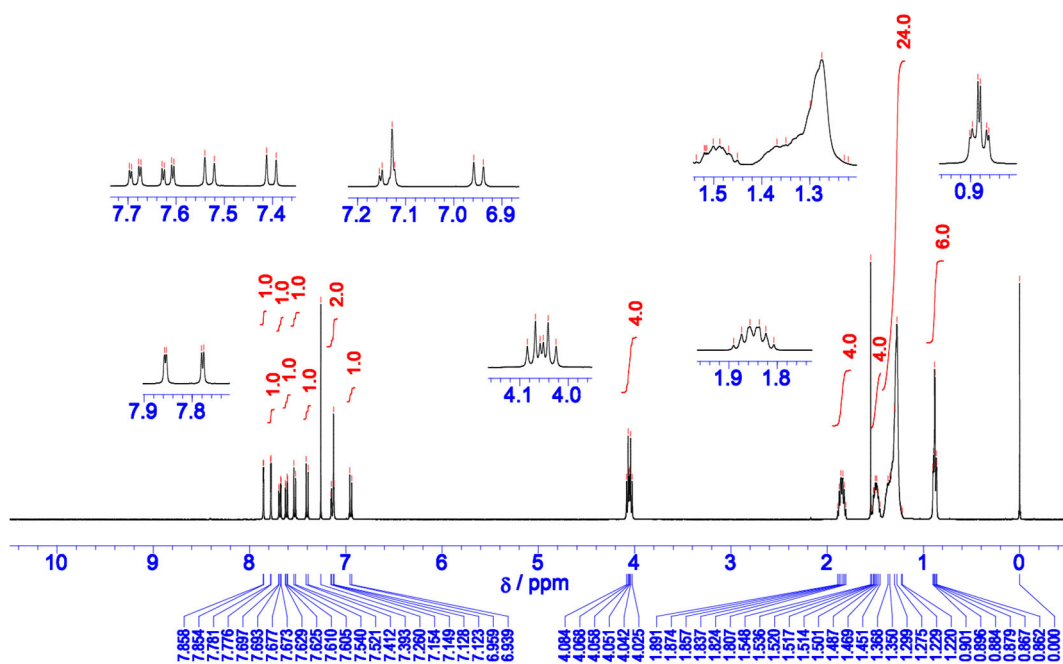

Fig. S18  $^1\text{H}$  NMR spectrum of 3.

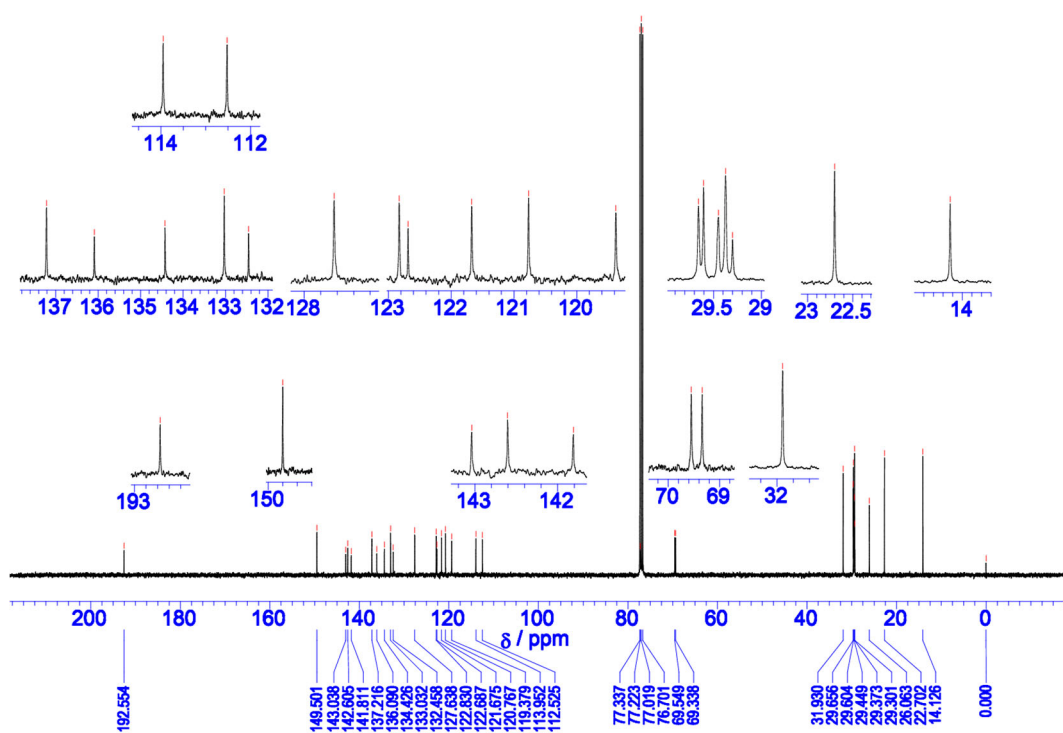

Fig. S19  $^{13}\text{C}$  NMR spectrum of 3.

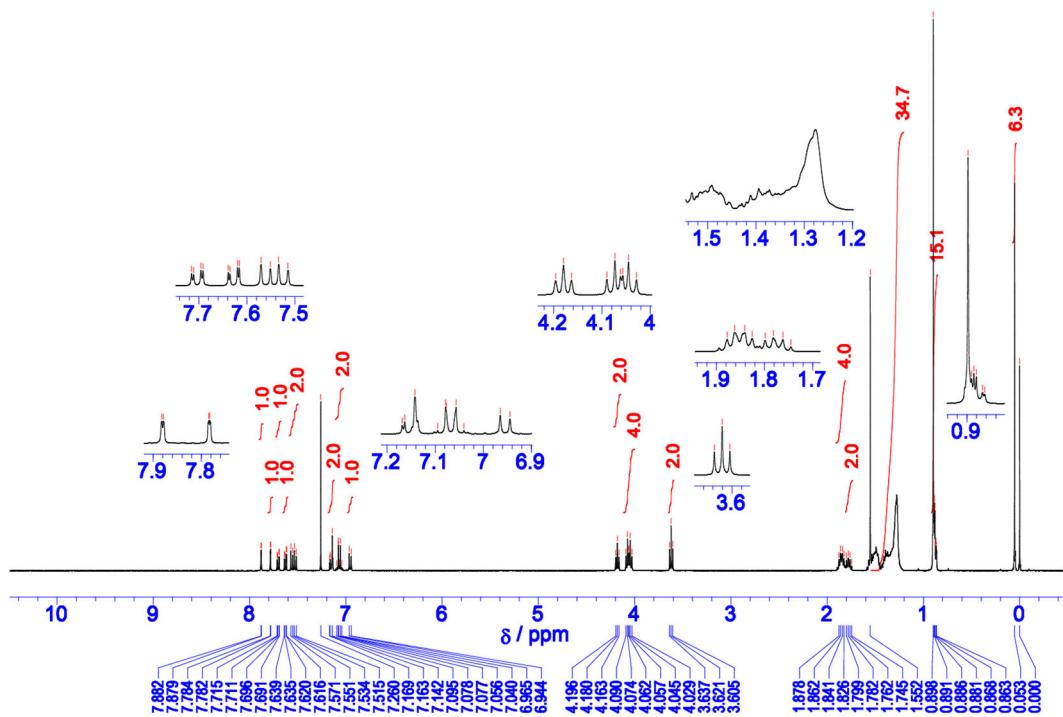

Fig. S20  $^1\text{H}$  NMR spectrum of 6.

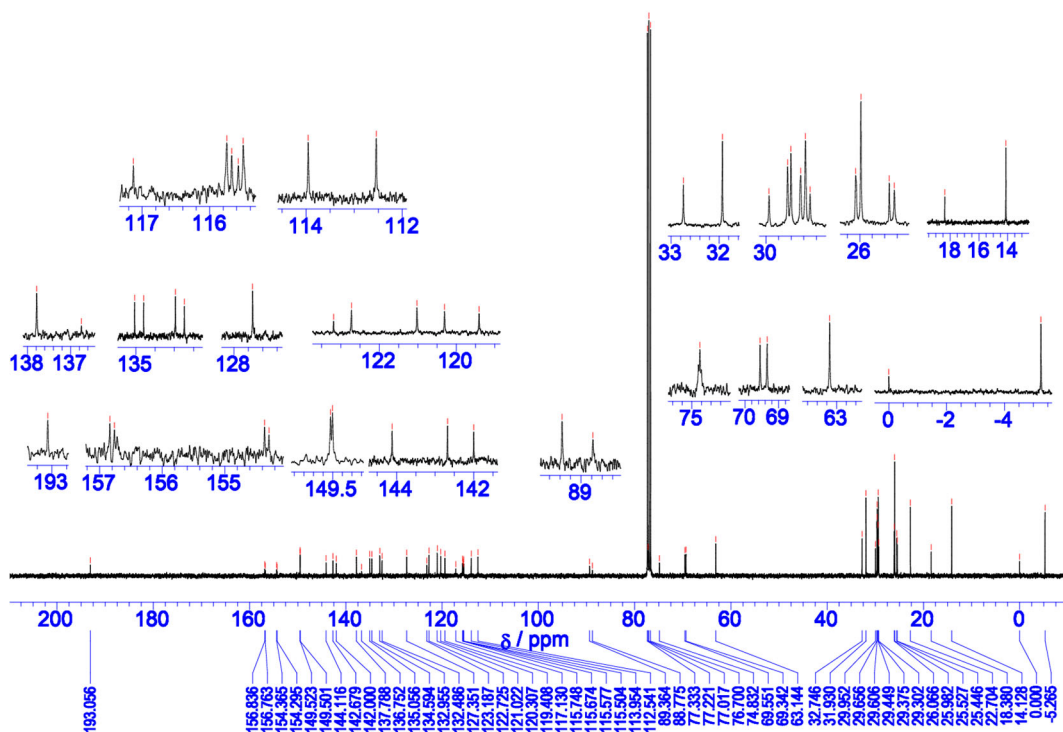

Fig. S21  $^{13}\text{C}$  NMR spectrum of 6.

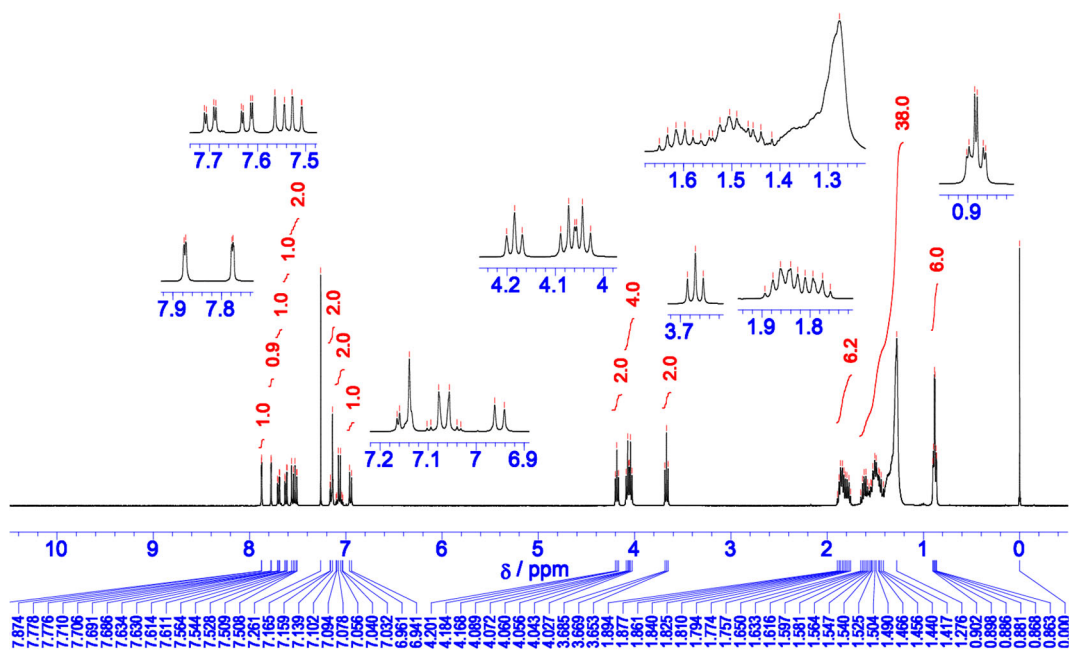

Fig. S22  $^1\text{H}$  NMR spectrum of 7.

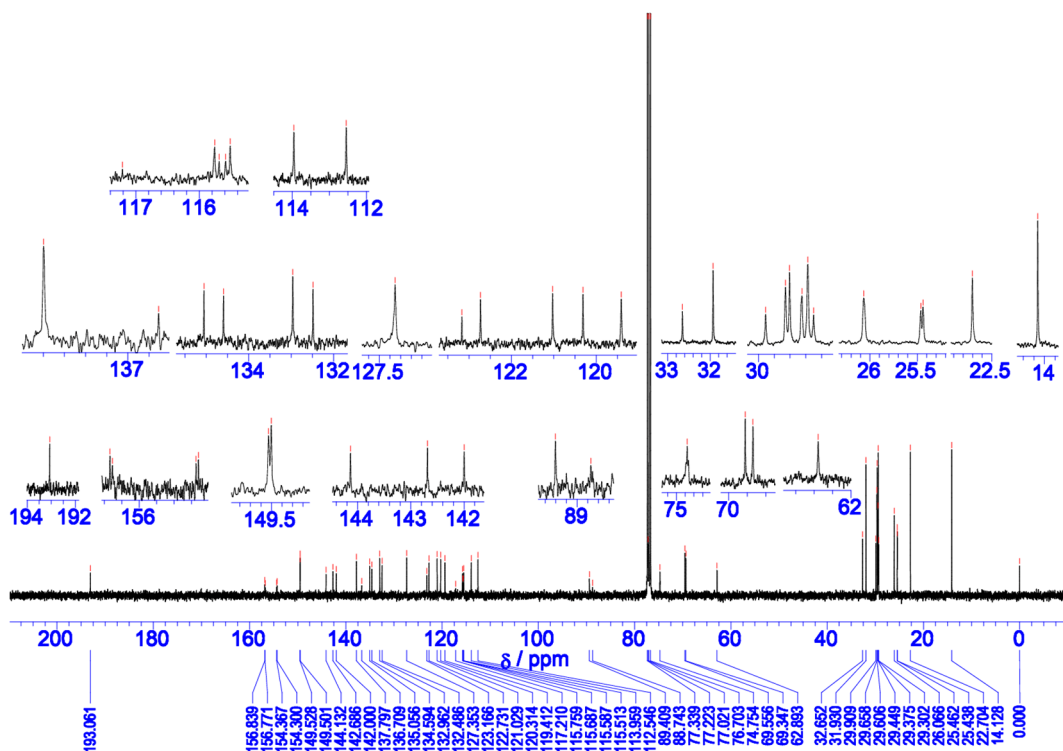

Fig. S23  $^{13}\text{C}$  NMR spectrum of 7.

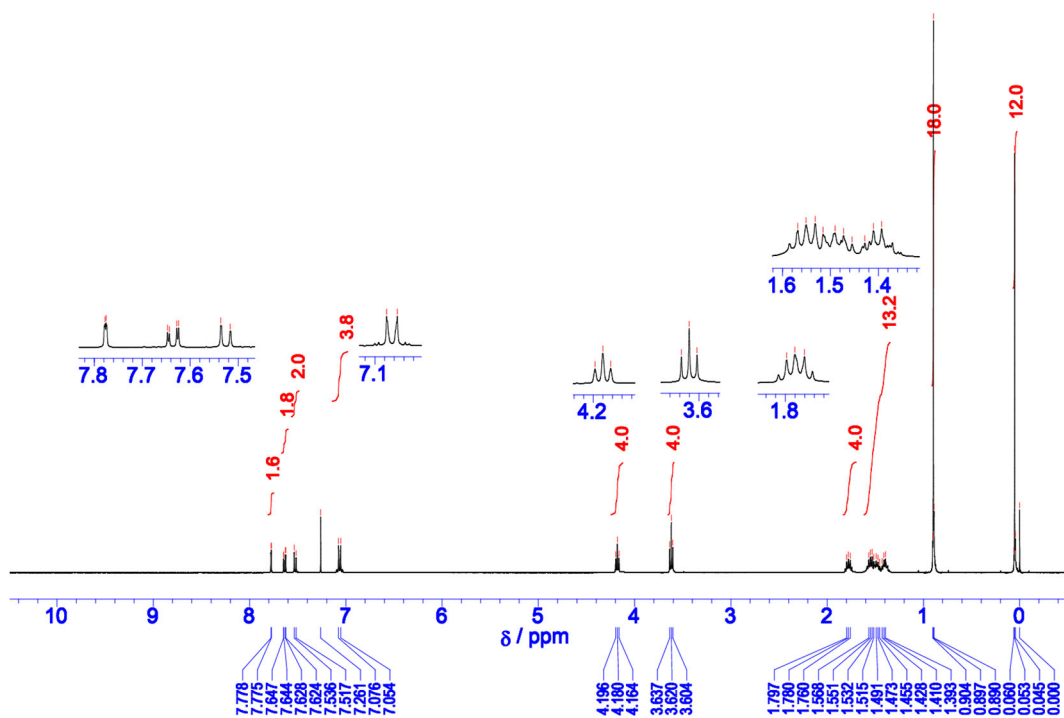

Fig. S24  $^1\text{H}$  NMR spectrum of **8**.

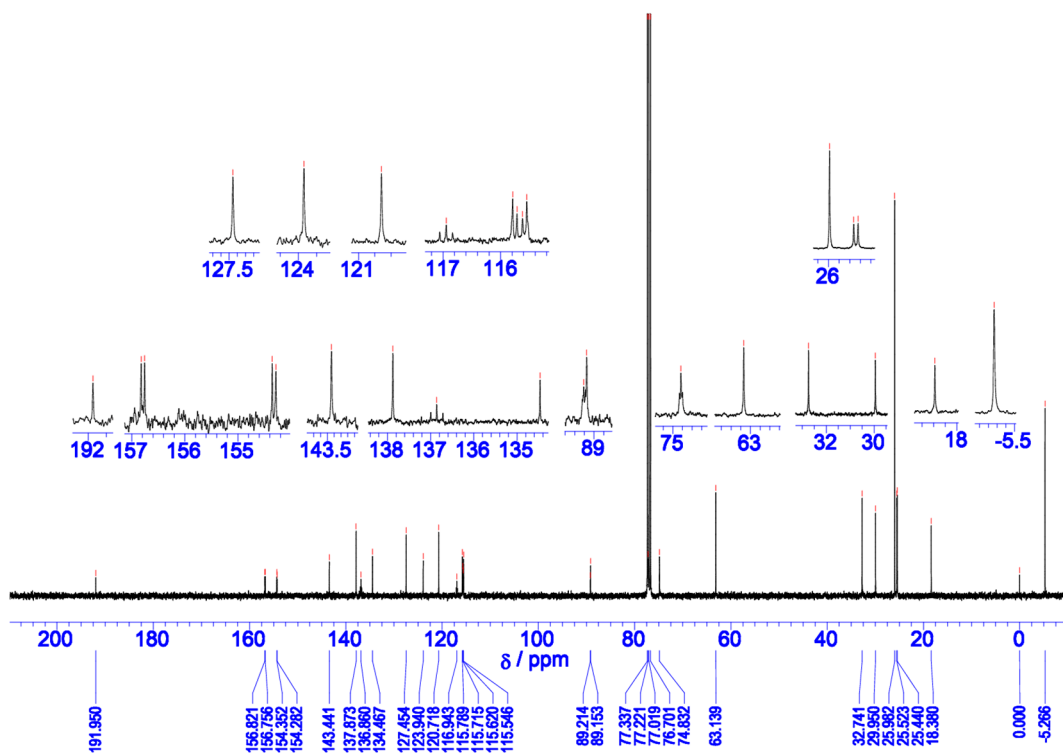

Fig. S25  $^{13}\text{C}$  NMR spectrum of **8**.

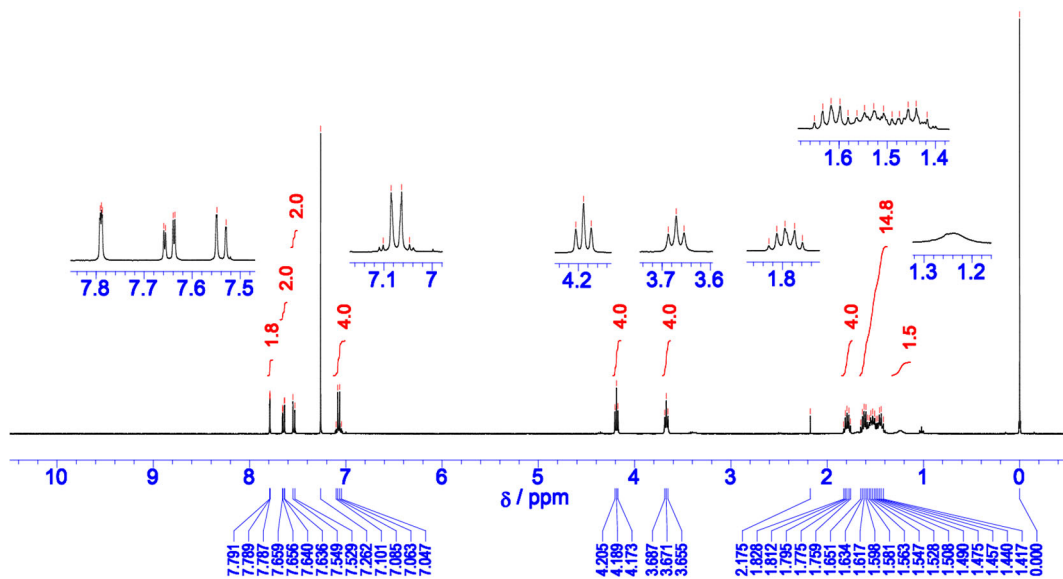

Fig. S26  $^1\text{H}$  NMR spectrum of **9**.

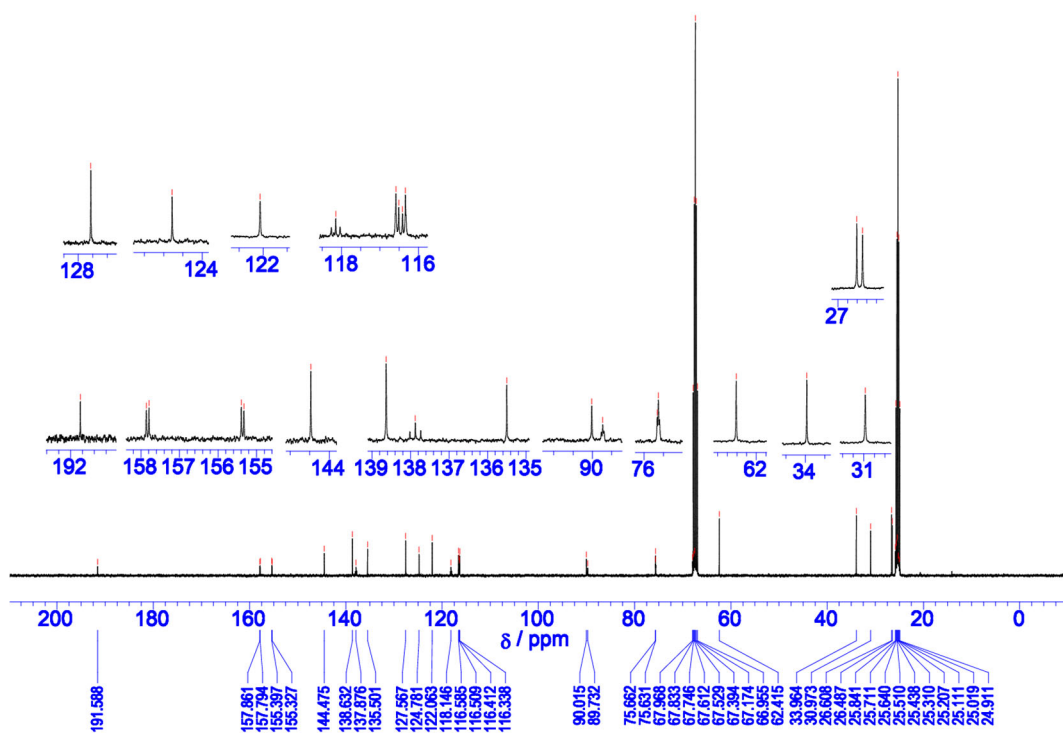

Fig. S27  $^{13}\text{C}$  NMR spectrum of **9**.

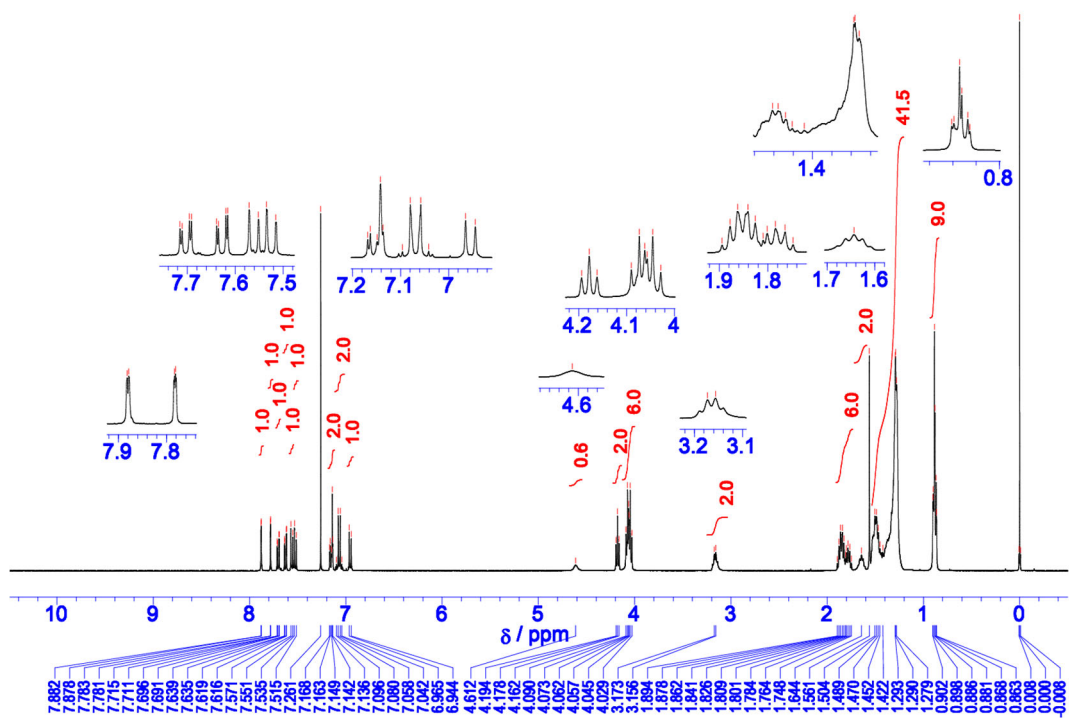

Fig. S28  $^1\text{H}$  NMR spectrum of FL-1.

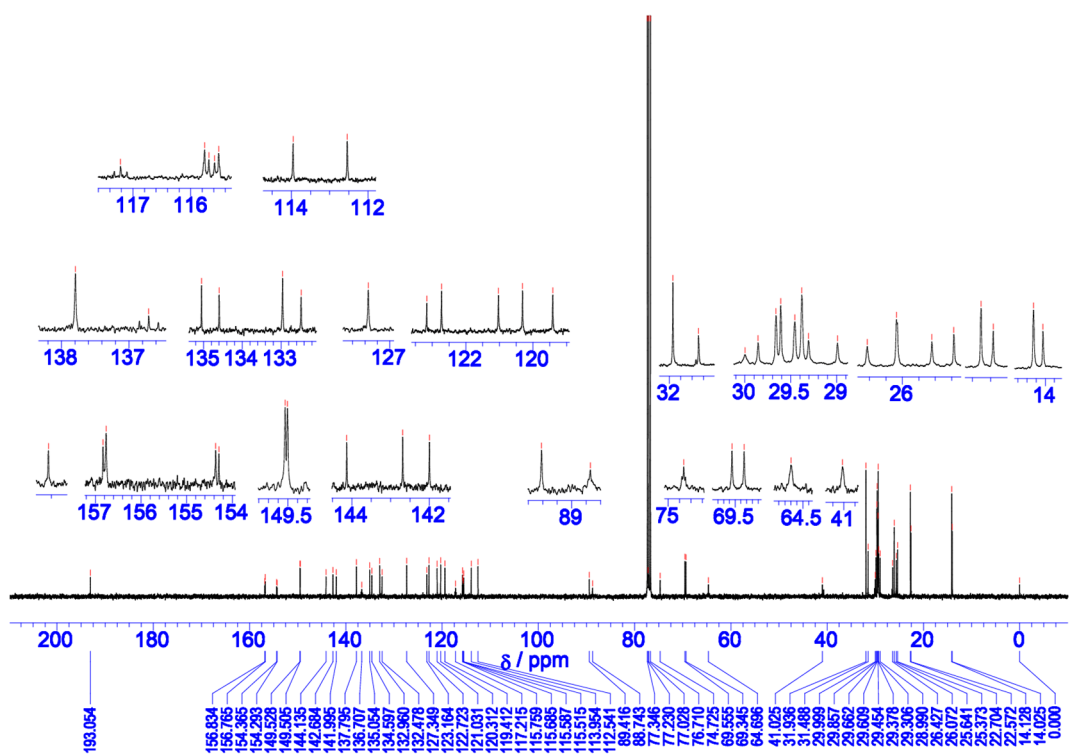

Fig. S29  $^{13}\text{C}$  NMR spectrum of FL-1.

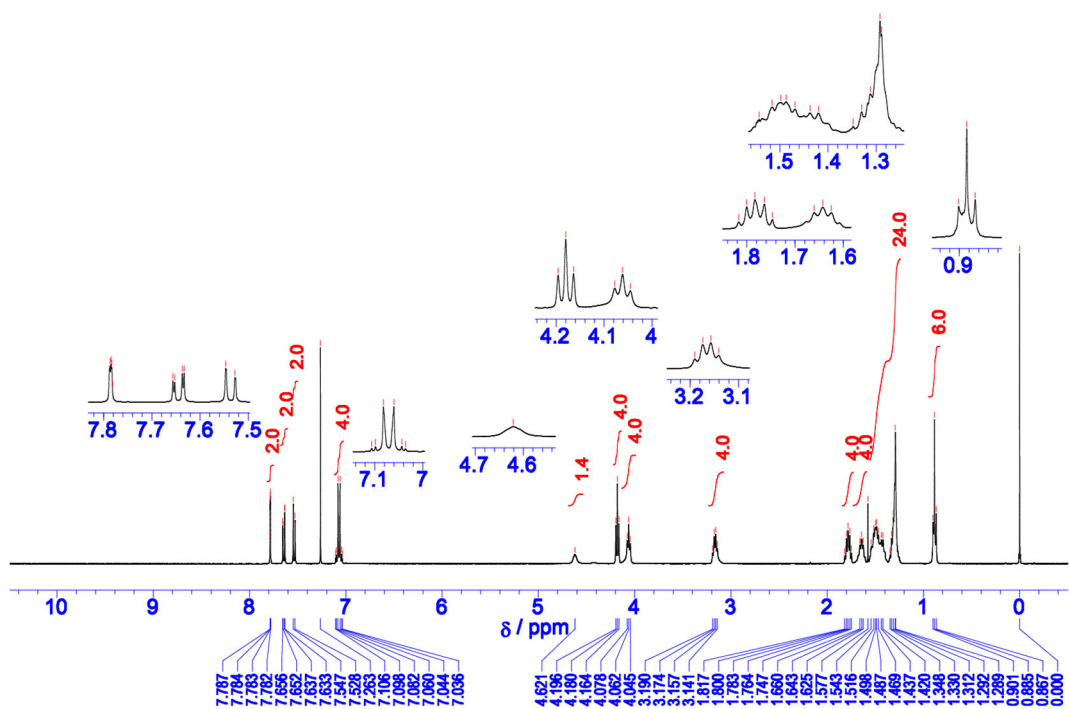

Fig. S30 <sup>1</sup>H NMR spectrum of FL-2.

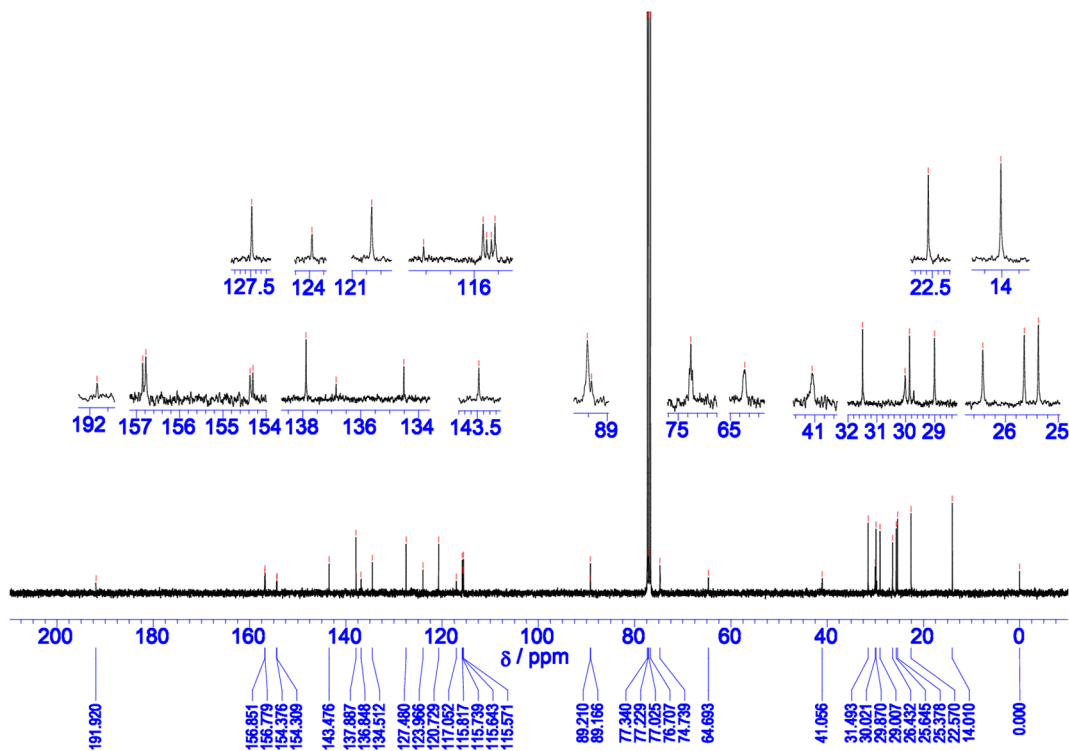

Fig. S31 <sup>13</sup>C NMR spectrum of FL-2.

| Formula<br>[M+H] <sup>+</sup>                                  | Theoretical<br>m/z | Found<br>m/z | RDB  | Delta m/z<br>(ppm) | Resolution |
|----------------------------------------------------------------|--------------------|--------------|------|--------------------|------------|
| C <sub>60</sub> H <sub>80</sub> F <sub>2</sub> NO <sub>6</sub> | 948.5948           | 948.5949     | 21.0 | 0.1                | 29554      |

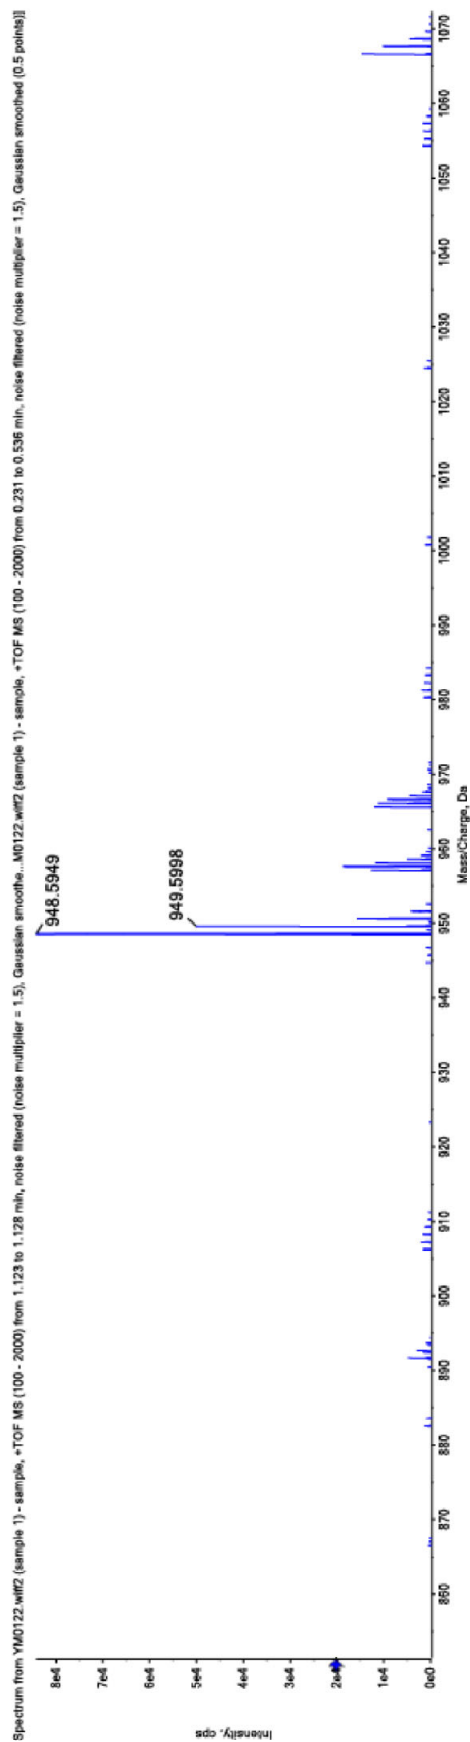

Fig. S32 High resolution ESI mass spectrum of FL-1.



| Formula                   | Theoretical<br><i>m/z</i> | Found<br><i>m/z</i> | RDB  | Delta <i>m/z</i><br>(ppm) | Resolution |
|---------------------------|---------------------------|---------------------|------|---------------------------|------------|
| <chem>C55H63F4N2O7</chem> | 939.4566                  | 939.4566            | 24.0 | 0.0                       | 29607      |

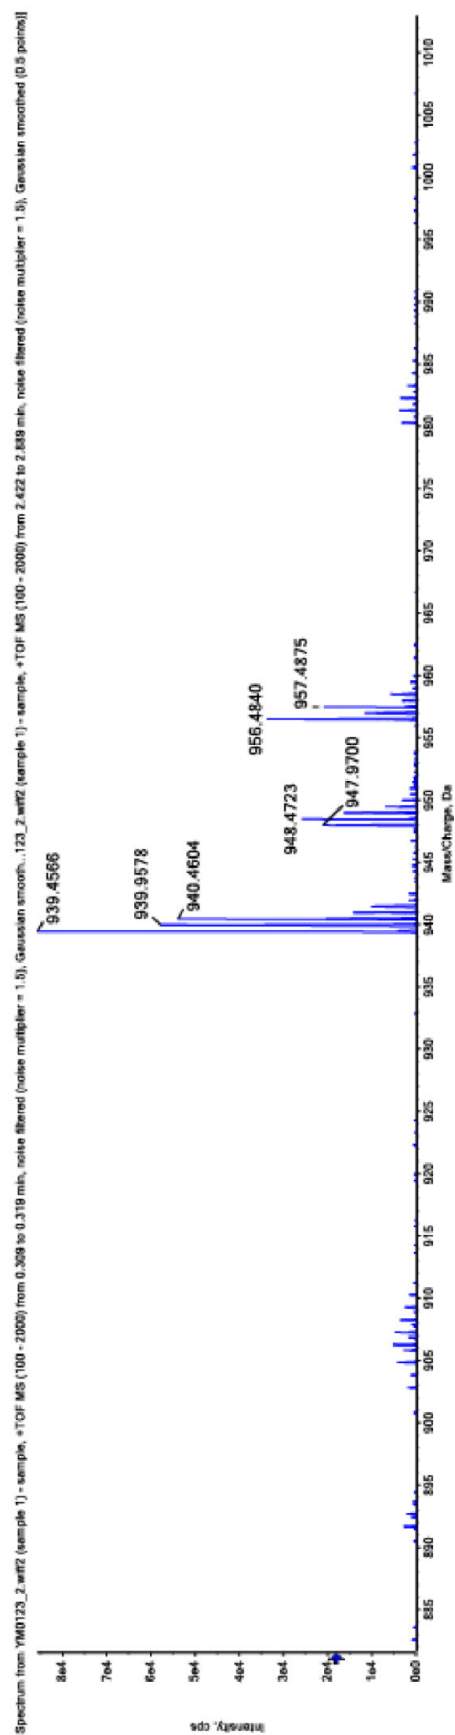

Fig. S33 High resolution ESI mass spectrum of FL-2.

## Notes and references

- S1 Y. Sagara, Y. C. Simon, N. Tamaoki and C. Weder, *Chem. Commun.*, 2016, **52**, 5694–5697.
- S2 C. V. Yelamaggad and G. Shanker, *Tetrahedron*, 2008, **64**, 3760–3771.
- S3 Gaussian 09, Revision D.01, M. J. Frisch, G. W. Trucks, H. B. Schlegel, G. E. Scuseria, M. A. Robb, J. R. Cheeseman, G. Scalmani, V. Barone, B. Mennucci, G. A. Petersson, H. Nakatsuji, M. Caricato, X. Li, H. P. Hratchian, A. F. Izmaylov, J. Bloino, G. Zheng, J. L. Sonnenberg, M. Hada, M. Ehara, K. Toyota, R. Fukuda, J. Hasegawa, M. Ishida, T. Nakajima, Y. Honda, O. Kitao, H. Nakai, T. Vreven, J. A. Montgomery, Jr., J. E. Peralta, F. Ogliaro, M. Bearpark, J. J. Heyd, E. Brothers, K. N. Kudin, V. N. Staroverov, R. Kobayashi, J. Normand, K. Raghavachari, A. Rendell, J. C. Burant, S. S. Iyengar, J. Tomasi, M. Cossi, N. Rega, J. M. Millam, M. Klene, J. E. Knox, J. B. Cross, V. Bakken, C. Adamo, J. Jaramillo, R. Gomperts, R. E. Stratmann, O. Yazyev, A. J. Austin, R. Cammi, C. Pomelli, J. W. Ochterski, R. L. Martin, K. Morokuma, V. G. Zakrzewski, G. A. Voth, P. Salvador, J. J. Dannenberg, S. Dapprich, A. D. Daniels, Ö. Farkas, J. B. Foresman, J. V. Ortiz, J. Cioslowski and D. J. Fox, Gaussian, Inc., Wallingford CT, 2009.
- S4 C. Lee, W. Yang and R. G. Parr, *Phys. Rev. B*, 1988, **37**, 785–789.
- S5 A. D. Becke, *J. Chem. Phys.*, 1993, **98**, 5648–5652.
- S6 G. A. Petersson, A. Bennett, T. G. Tensfeldt, M. A. Al-Laham, W. A. Shirley and J. Mantzaris, *J. Chem. Phys.*, 1988, **89**, 2193–2218.
- S7 G. A. Petersson, M. A. Al-Laham, *J. Chem. Phys.*, 1991, **94**, 6081–6090.
- S8 A. S. Klymchenko and A. P. Demchenko, *Phys. Chem. Chem. Phys.*, 2003, **5**, 461–468.
